# Supplementary material for: Stereoselective total syntheses of (−)-hygrophorone A12, 4-O-acetyl-hygrophorone A12 and (+)-hygrophorone B12
Source: Royal Society of Chemistry journal article supplement (doi:10.1039/d0ob02303e), 2020-12-28
Supplement: d0ob02303e1.pdf [file d0ob02303e1.pdf]

## Supplementary Information

### Stereoselective total syntheses of (–)-hygrophorone A<sup>12</sup>, 4-*O*-acetyl- hygrophorone A<sup>12</sup> and (+)-hygrophorone B<sup>12</sup>

Sayani Das, Anu Dalal and Shivajirao L. Gholap\*

Department of Chemistry, Indian Institute of Technology Delhi, Hauz Khas, New Delhi 110016

\*Email: slgholap@chemistry.iitd.ac.in; Tel: +91 11 26591316

#### Table of Contents

|                                                                                                                       |      |
|-----------------------------------------------------------------------------------------------------------------------|------|
| Copies of <sup>1</sup> H and <sup>13</sup> C-NMR spectra of compound <b>10</b>                                        | S-02 |
| Copies of <sup>1</sup> H and <sup>13</sup> C-NMR spectra of compound <b>11</b>                                        | S-03 |
| Copies of <sup>1</sup> H and <sup>13</sup> C-NMR spectra of compound <b>12</b>                                        | S-04 |
| Copies of <sup>1</sup> H and <sup>13</sup> C-NMR spectra of compound <b>13</b>                                        | S-05 |
| Copies of <sup>1</sup> H and <sup>13</sup> C-NMR spectra of compound <b>8</b>                                         | S-06 |
| Copies of <sup>1</sup> H and <sup>13</sup> C-NMR spectra of compound <b>14</b>                                        | S-07 |
| Copies of <sup>1</sup> H and <sup>13</sup> C-NMR spectra of compound <b>15</b>                                        | S-08 |
| Copies of <sup>1</sup> H and <sup>13</sup> C-NMR spectra of compound <b>7</b>                                         | S-09 |
| Copies of <sup>1</sup> H and <sup>13</sup> C-NMR spectra of compound <b>6</b>                                         | S-10 |
| Copies of <sup>1</sup> H and <sup>13</sup> C-NMR spectra of compound <b>16</b>                                        | S-11 |
| Copies of <sup>1</sup> H and <sup>13</sup> C-NMR spectra of (–)-hygrophorone A <sup>12</sup> <b>1</b>                 | S-12 |
| Copies of <sup>1</sup> H and <sup>13</sup> C-NMR spectra of (+)-hygrophorone A <sup>12</sup> <i>ent</i> - <b>1</b>    | S-13 |
| Copies of <sup>1</sup> H and <sup>13</sup> C-NMR spectra of compound <b>17</b>                                        | S-14 |
| Copies of <sup>1</sup> H and <sup>13</sup> C-NMR spectra of compound <b>18</b>                                        | S-15 |
| Copies of <sup>1</sup> H and <sup>13</sup> C-NMR spectra of 4- <i>O</i> -acetyl-hygrophorone A <sup>12</sup> <b>2</b> | S-16 |
| Copies of <sup>1</sup> H and <sup>13</sup> C-NMR spectra of compound <b>19</b>                                        | S-17 |
| Copies of <sup>1</sup> H and <sup>13</sup> C-NMR spectra of compound <b>20</b>                                        | S-18 |
| Copies of <sup>1</sup> H and <sup>13</sup> C-NMR spectra of compound <b>21</b>                                        | S-19 |
| Copies of <sup>1</sup> H and <sup>13</sup> C-NMR spectra of (+)-hygrophorone B <sup>12</sup> <b>2</b>                 | S-20 |
| Single crystal X-ray diffraction data for (+)-hygrophorone A <sup>12</sup> <i>ent</i> - <b>1</b>                      | S-21 |

$^1\text{H}$  NMR of compound **10** (400 MHz) in  $\text{CDCl}_3$

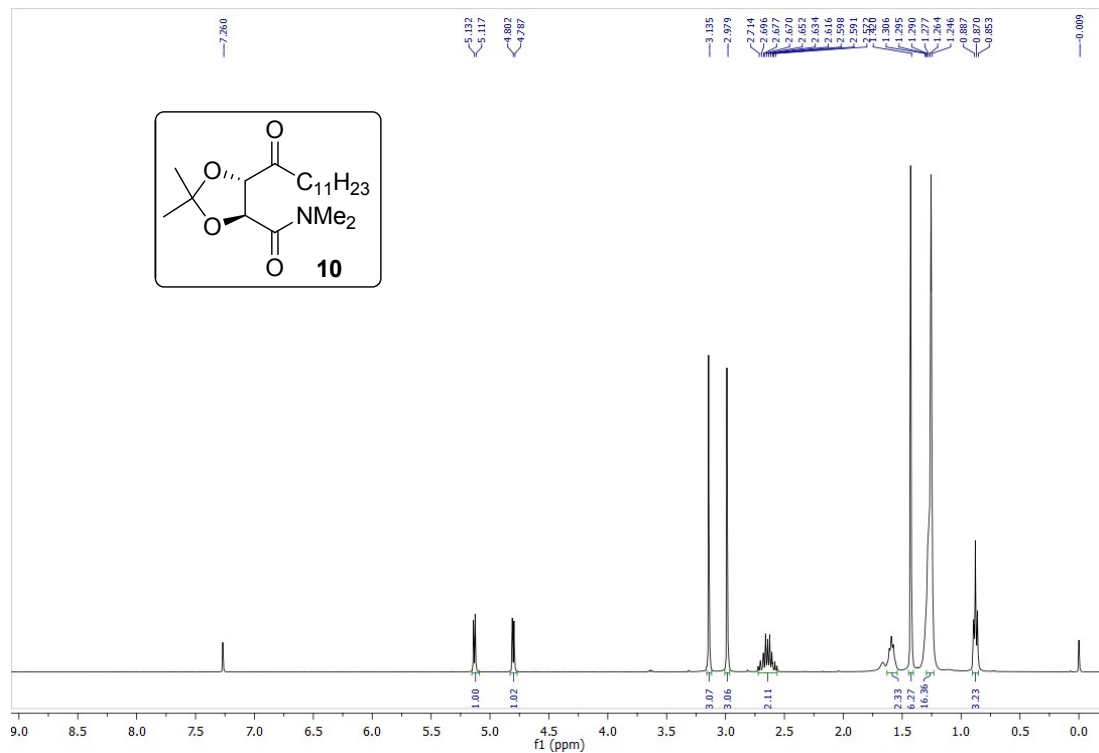

$^{13}\text{C}$  NMR of compound **10** (125 MHz) in  $\text{CDCl}_3$

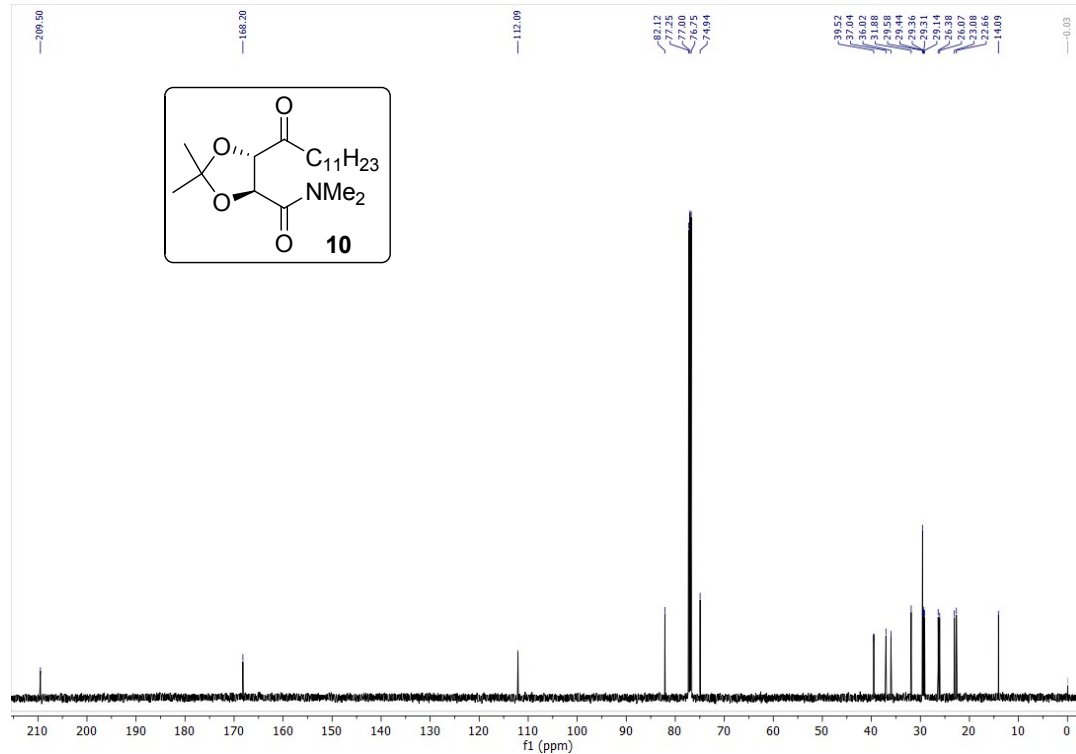

$^1\text{H}$  NMR of compound **11** (400 MHz) in  $\text{CDCl}_3$

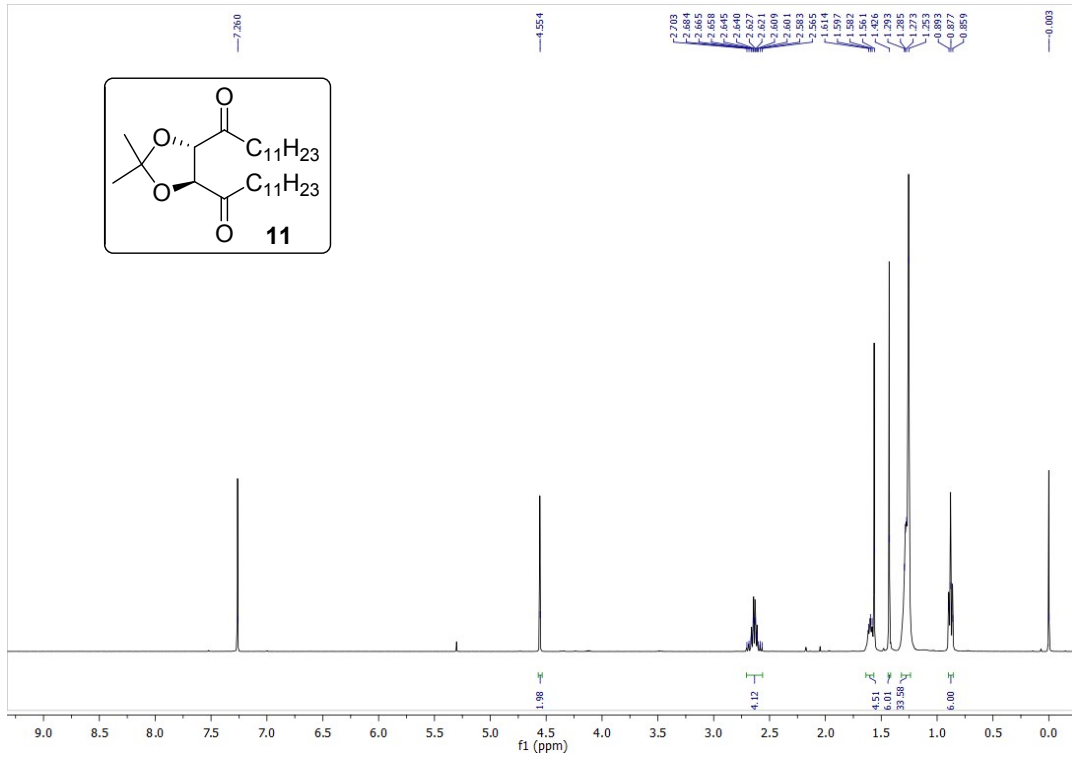

$^{13}\text{C}$  NMR of compound **11** (100 MHz) in  $\text{CDCl}_3$

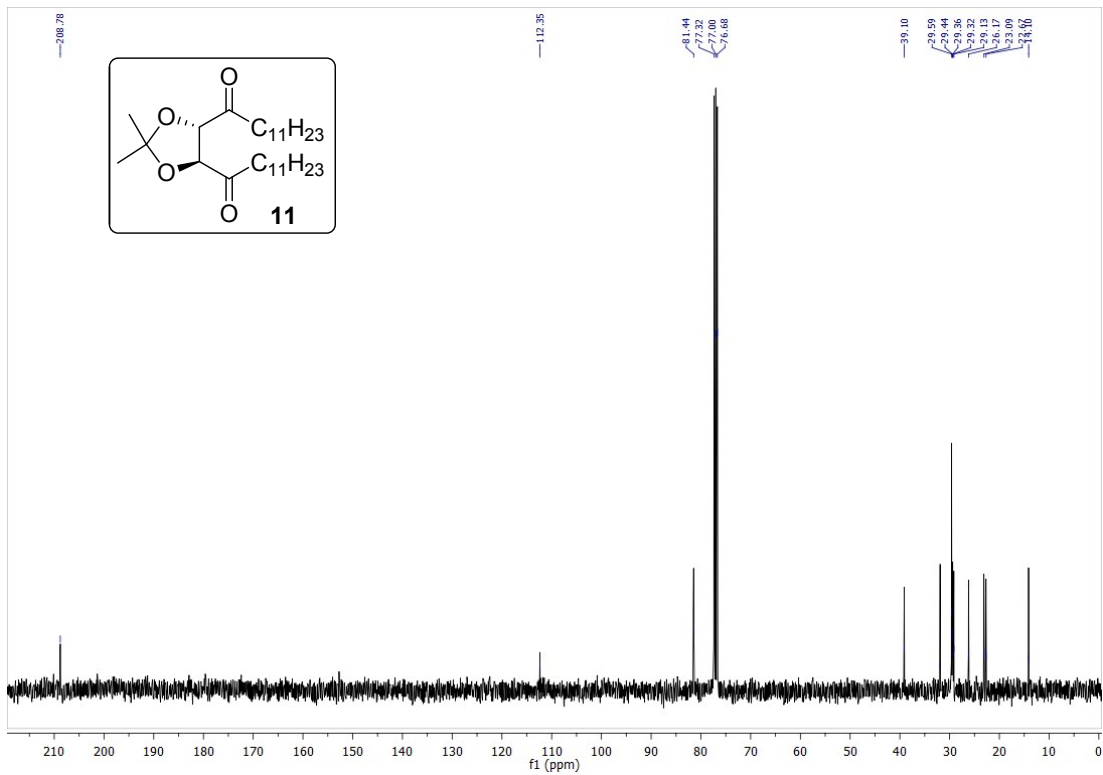

<sup>1</sup>H NMR of compound **12** (500 MHz) in CDCl<sub>3</sub>

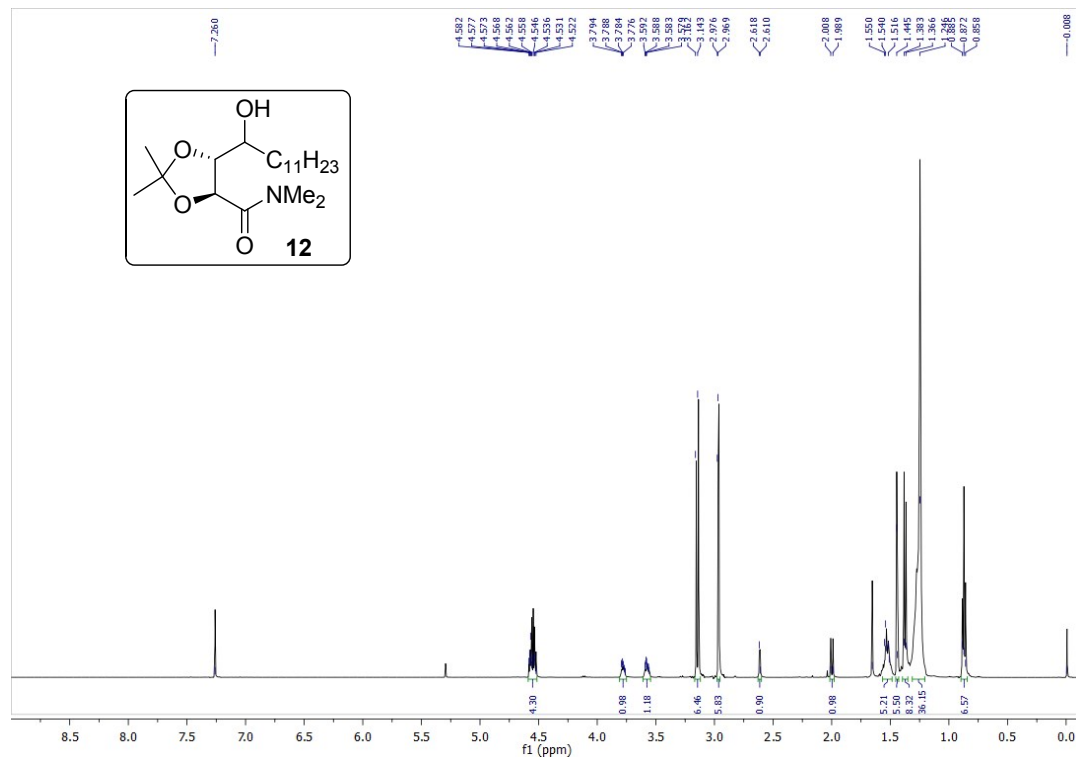

<sup>13</sup>C NMR of compound **12** (75 MHz) in CDCl<sub>3</sub>

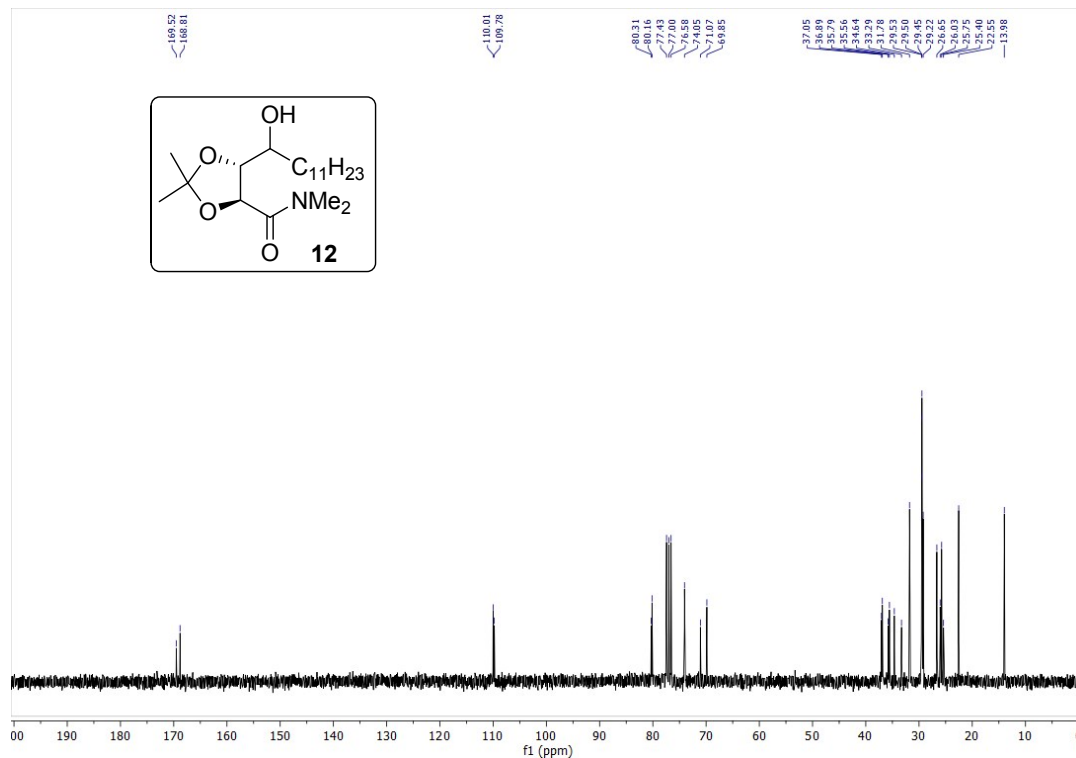

$^1\text{H}$  NMR of compound **13** (400 MHz) in  $\text{CDCl}_3$

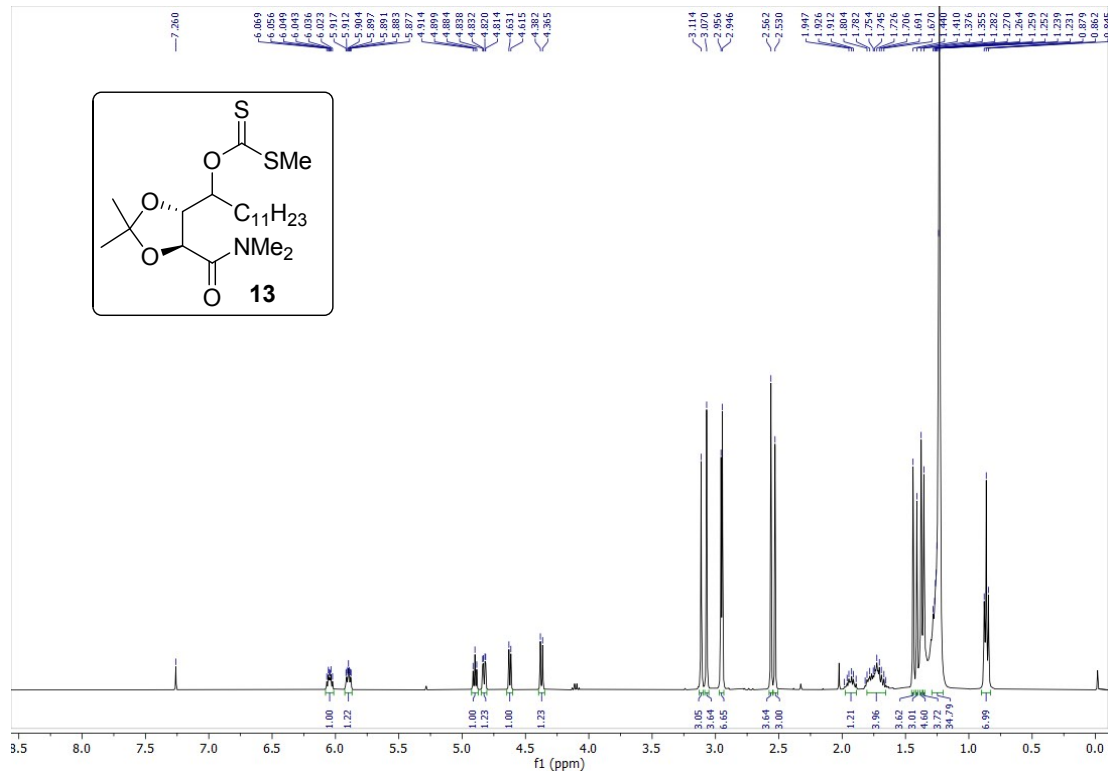

$^{13}\text{C}$  NMR of compound **13** (100 MHz) in  $\text{CDCl}_3$

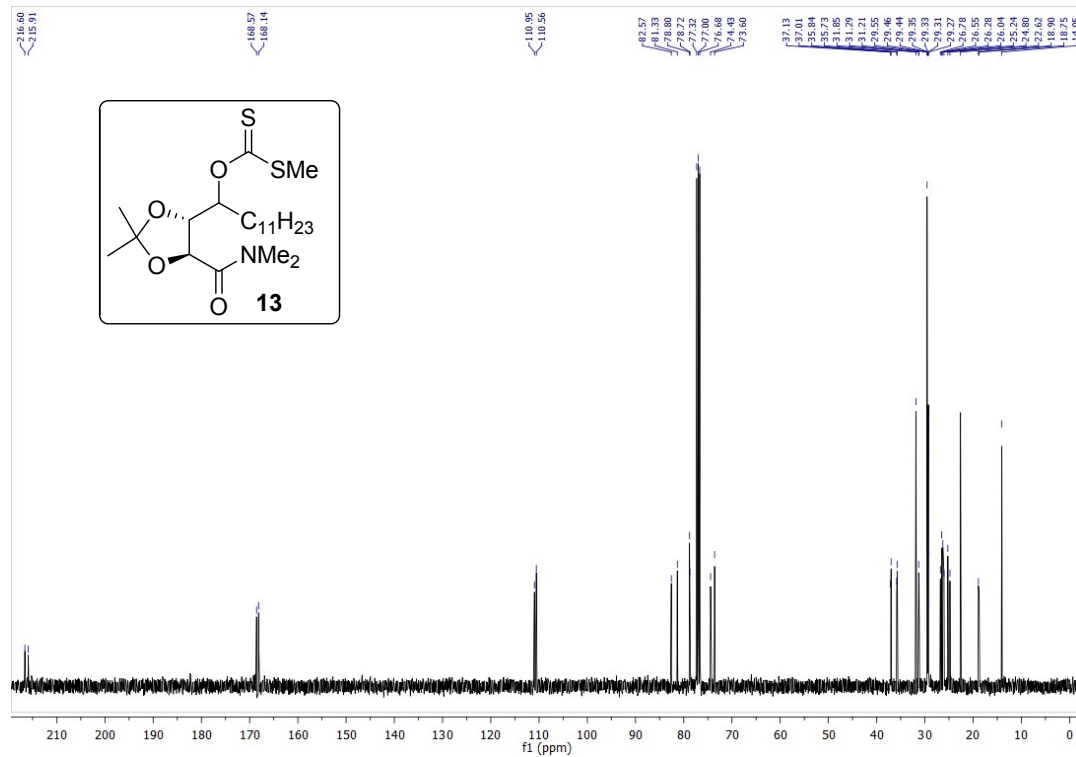

$^1\text{H}$  NMR of compound **8** (400 MHz) in  $\text{CDCl}_3$

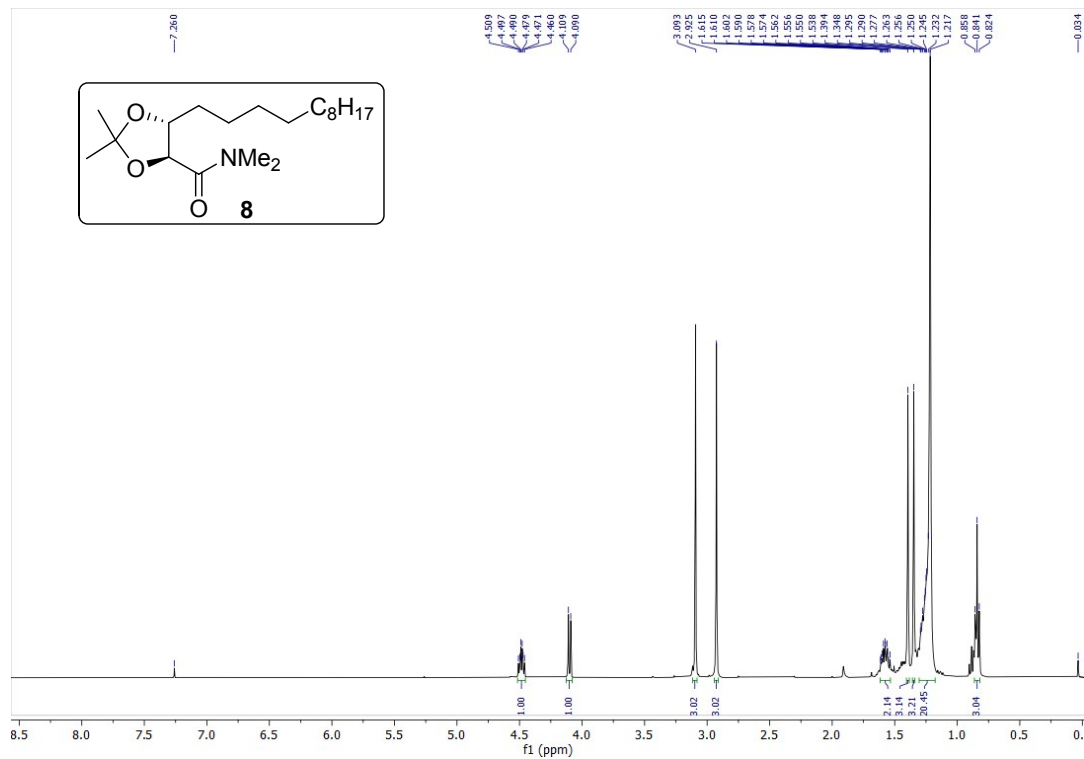

$^{13}\text{C}$  NMR of compound **8** (125 MHz) in  $\text{CDCl}_3$

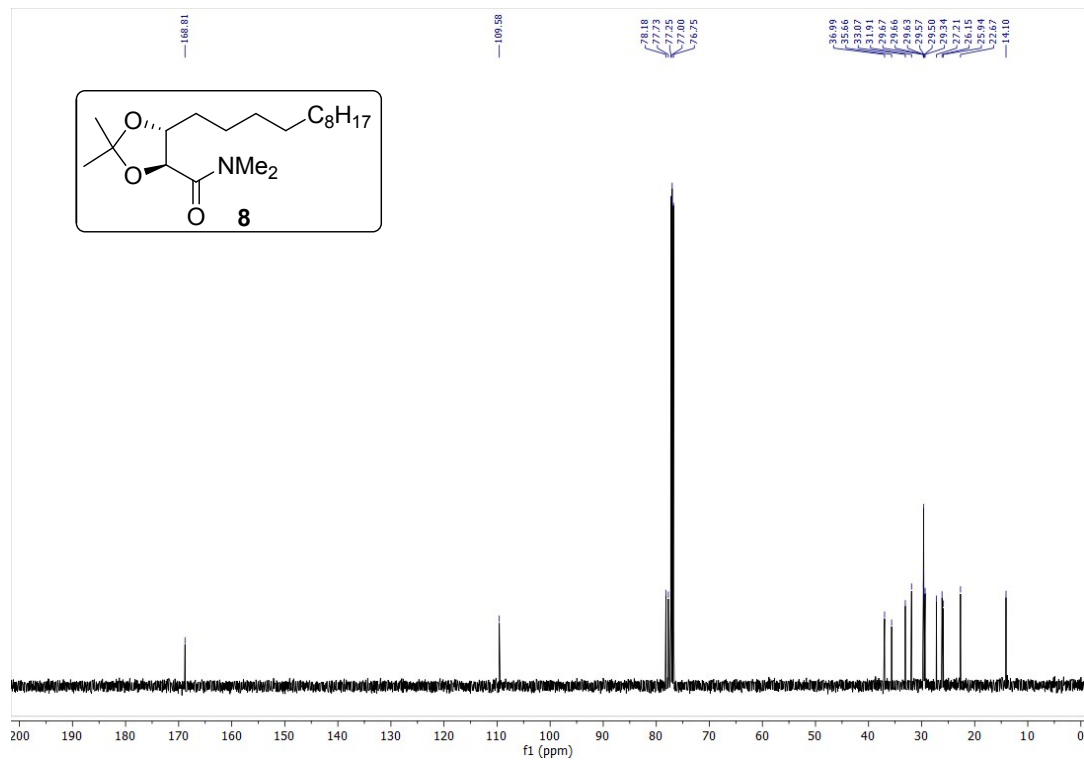

$^1\text{H}$  NMR of compound **14** (500 MHz) in  $\text{CDCl}_3$

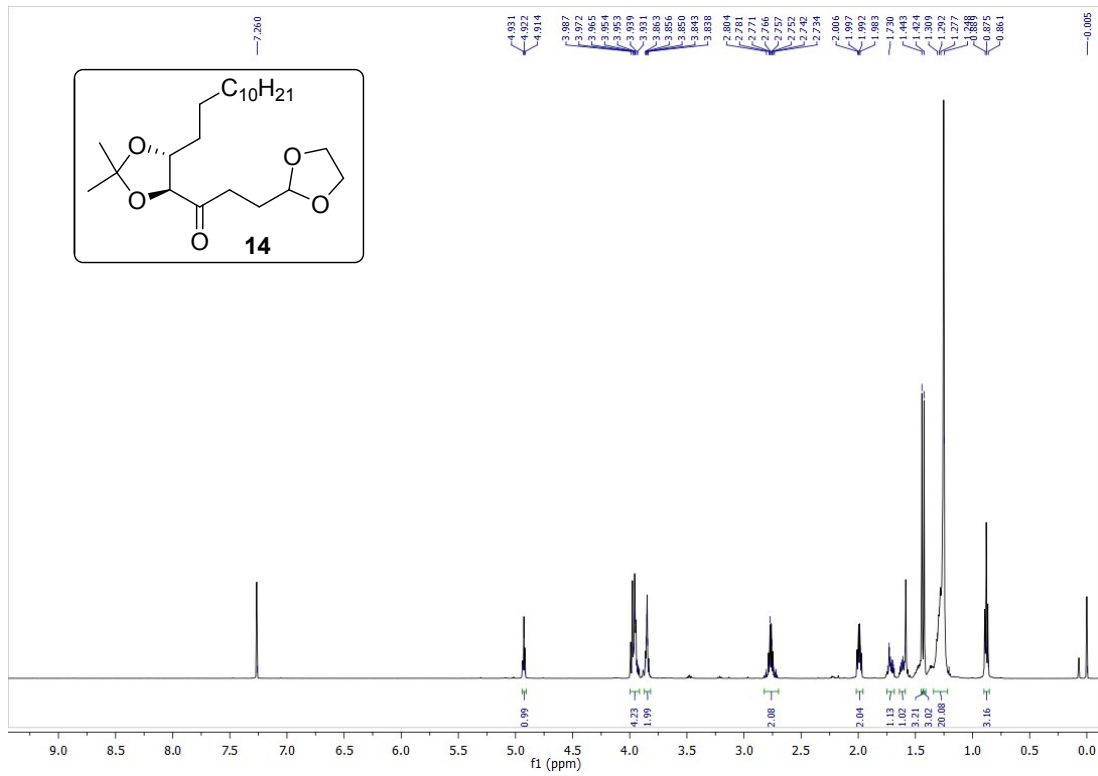

$^{13}\text{C}$  NMR of compound **14** (125 MHz) in  $\text{CDCl}_3$

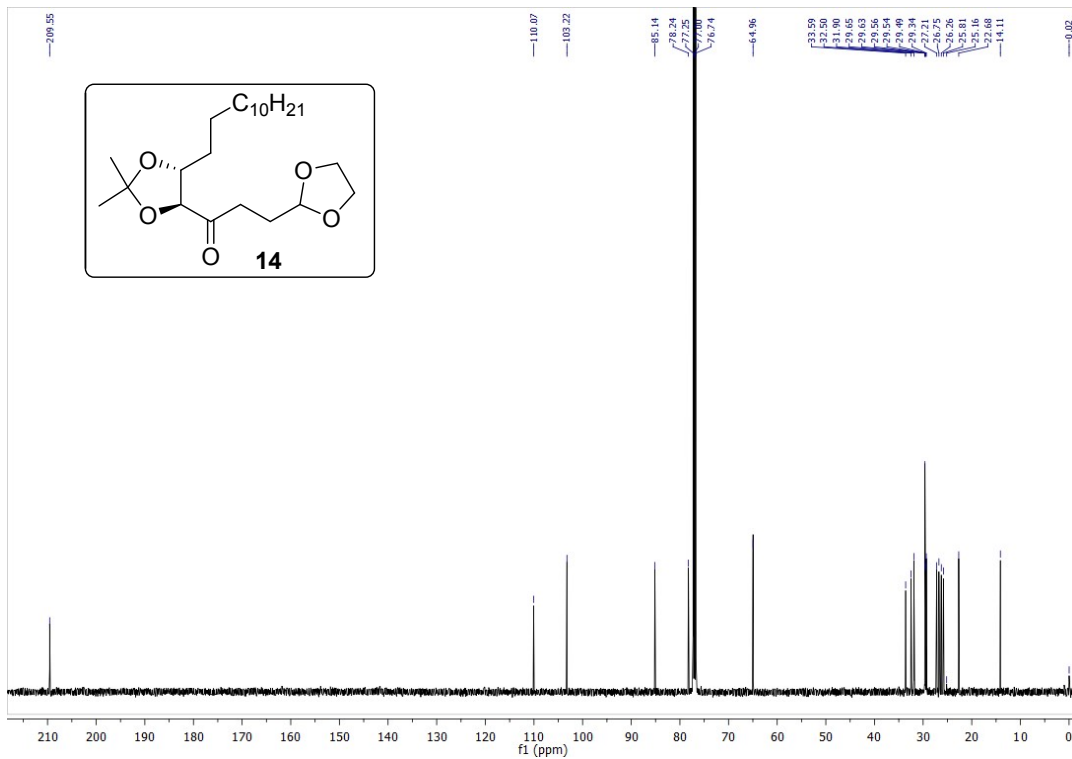

$^1\text{H}$  NMR of compound **15** (500 MHz) in  $\text{CDCl}_3$

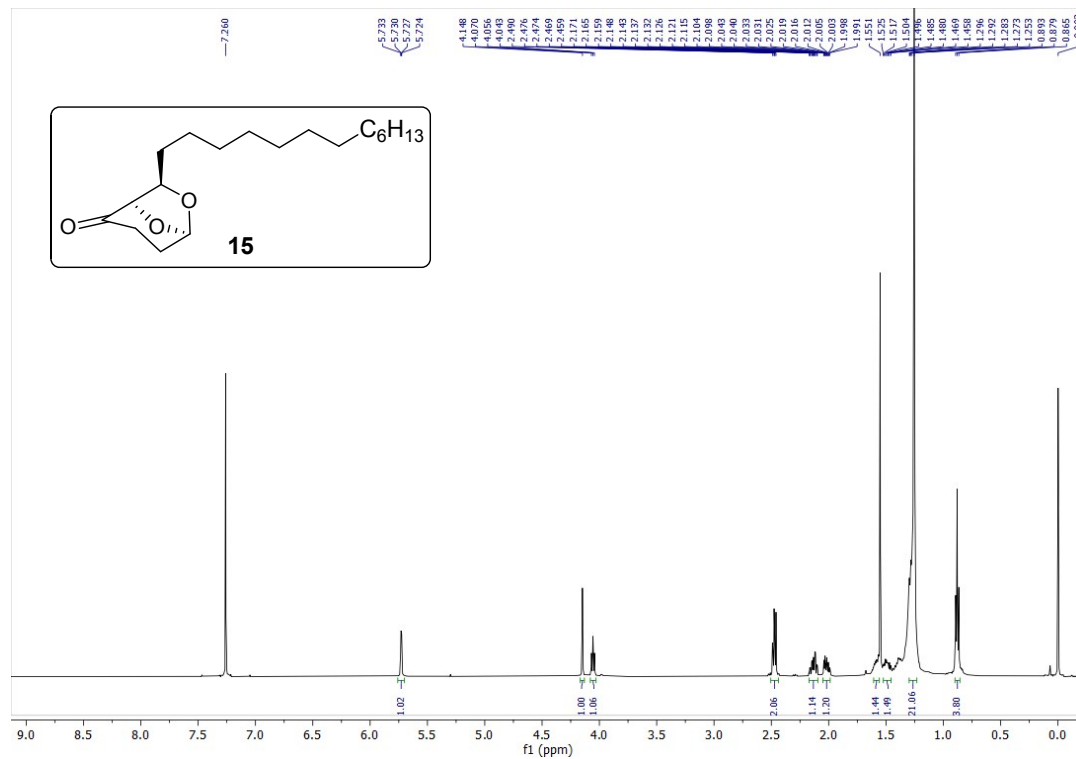

$^{13}\text{C}$  NMR of compound **15** (100 MHz) in  $\text{CDCl}_3$

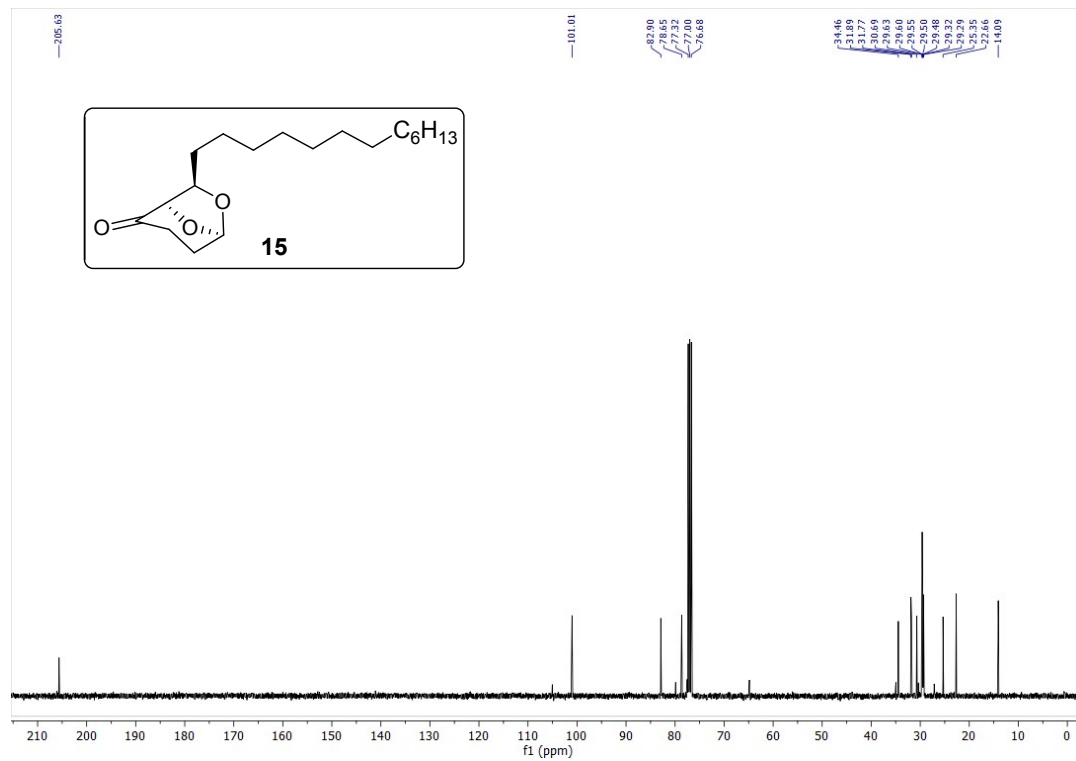



<sup>1</sup>H NMR of compound 7 (500 MHz) in CDCl<sub>3</sub>

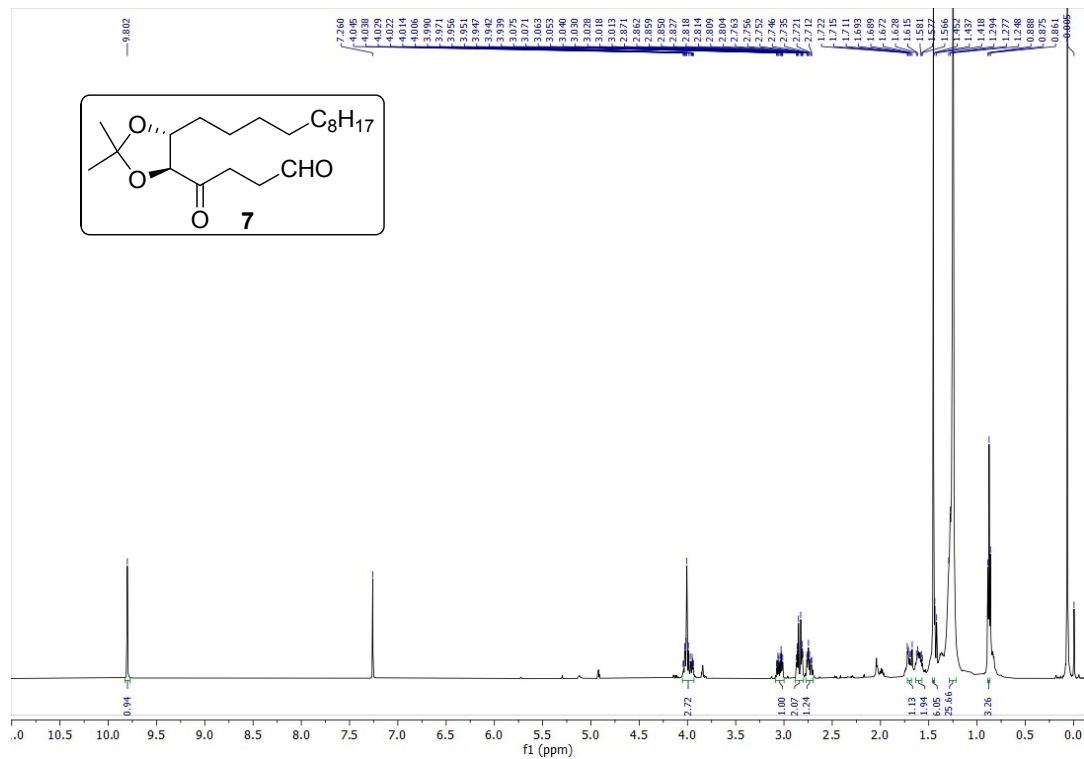

<sup>13</sup>C NMR of compound 7 (125 MHz) in CDCl<sub>3</sub>

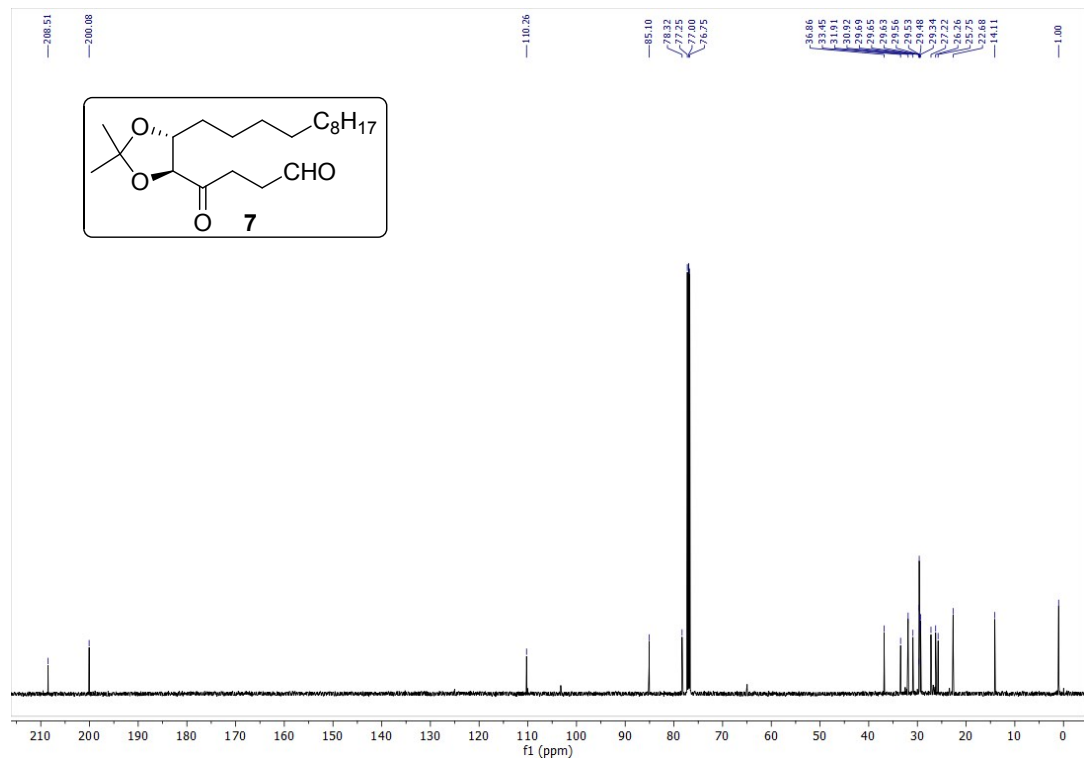

$^1\text{H}$  NMR of compound **6** (500 MHz) in  $\text{CDCl}_3$

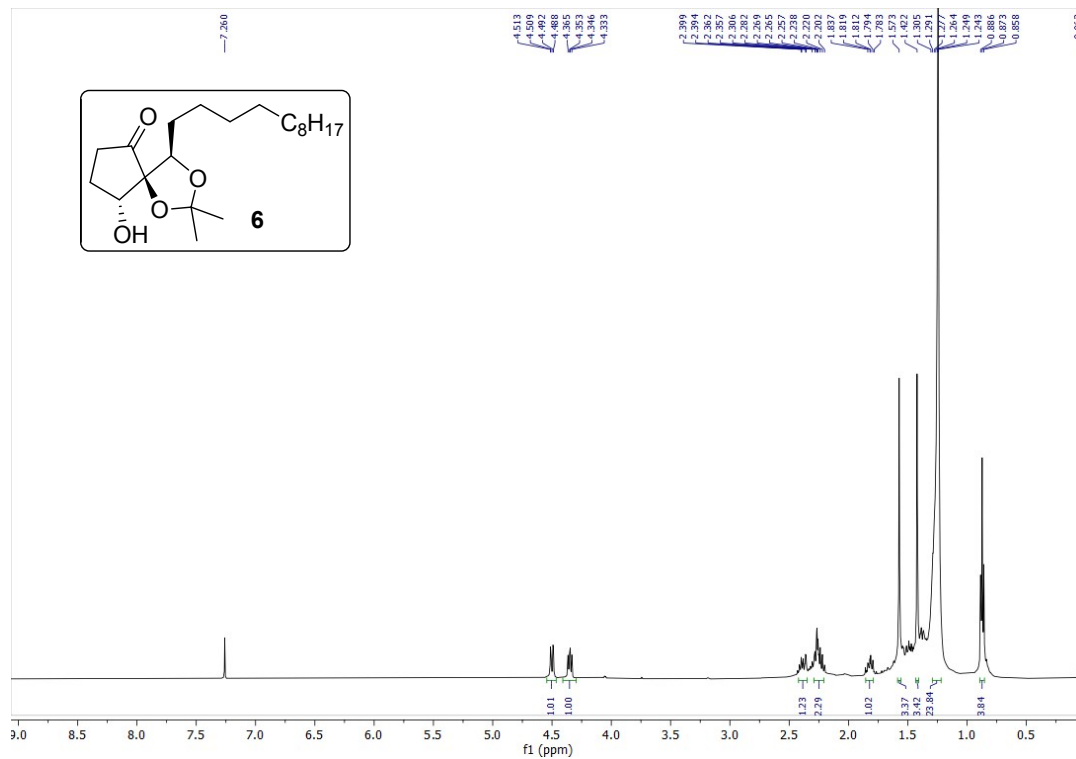

$^{13}\text{C}$  NMR of compound **6** (125 MHz) in  $\text{CDCl}_3$

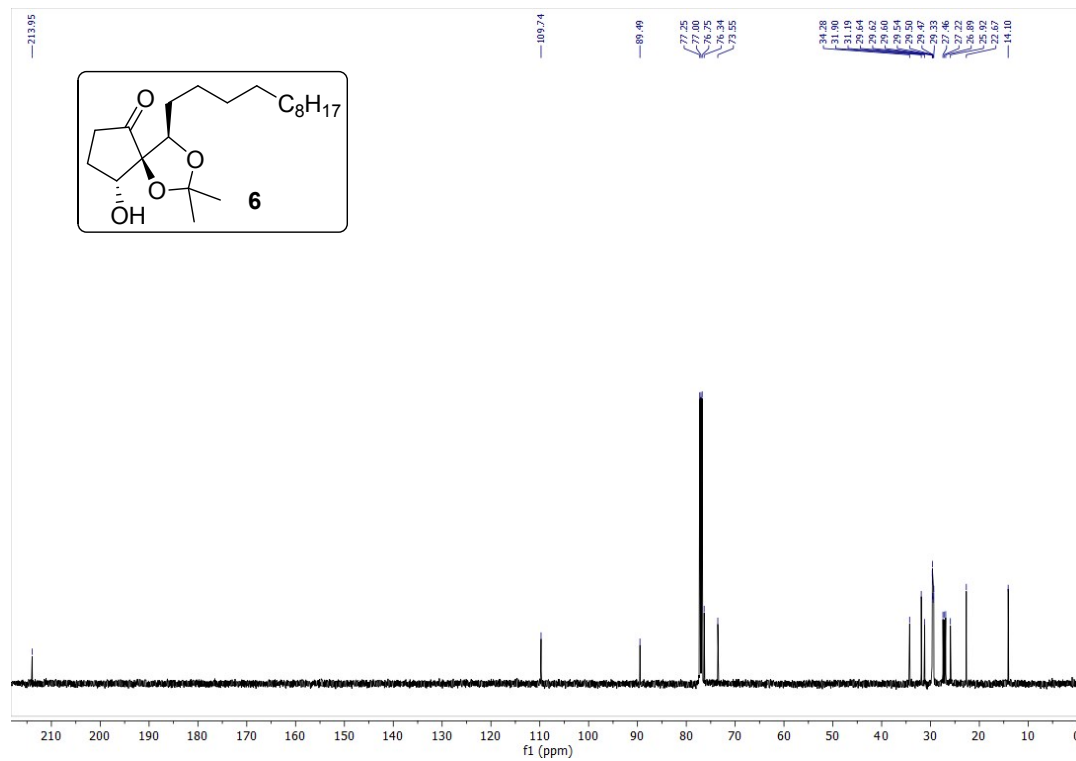

$^1\text{H}$  NMR of compound **16** (500 MHz) in  $\text{CDCl}_3$

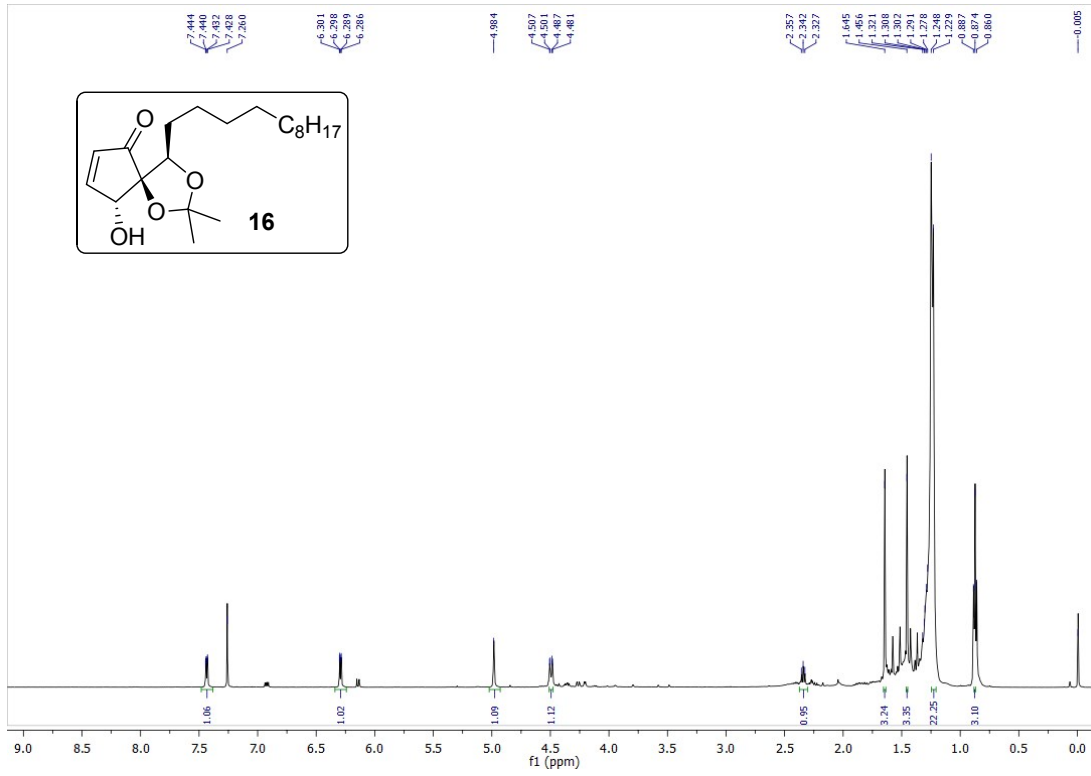

$^{13}\text{C}$  NMR of compound **16** (125 MHz) in  $\text{CDCl}_3$

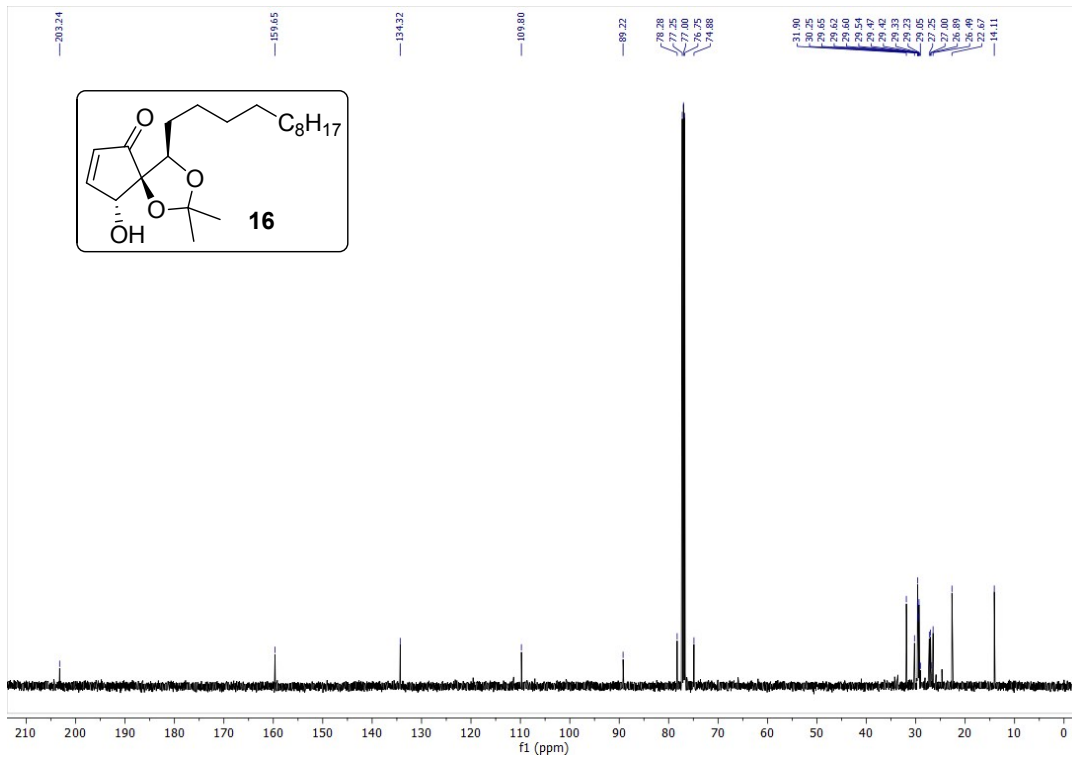

$^1\text{H}$  NMR of (-)-hygrophorone A<sup>12</sup> **1** (500 MHz) in  $\text{CDCl}_3$

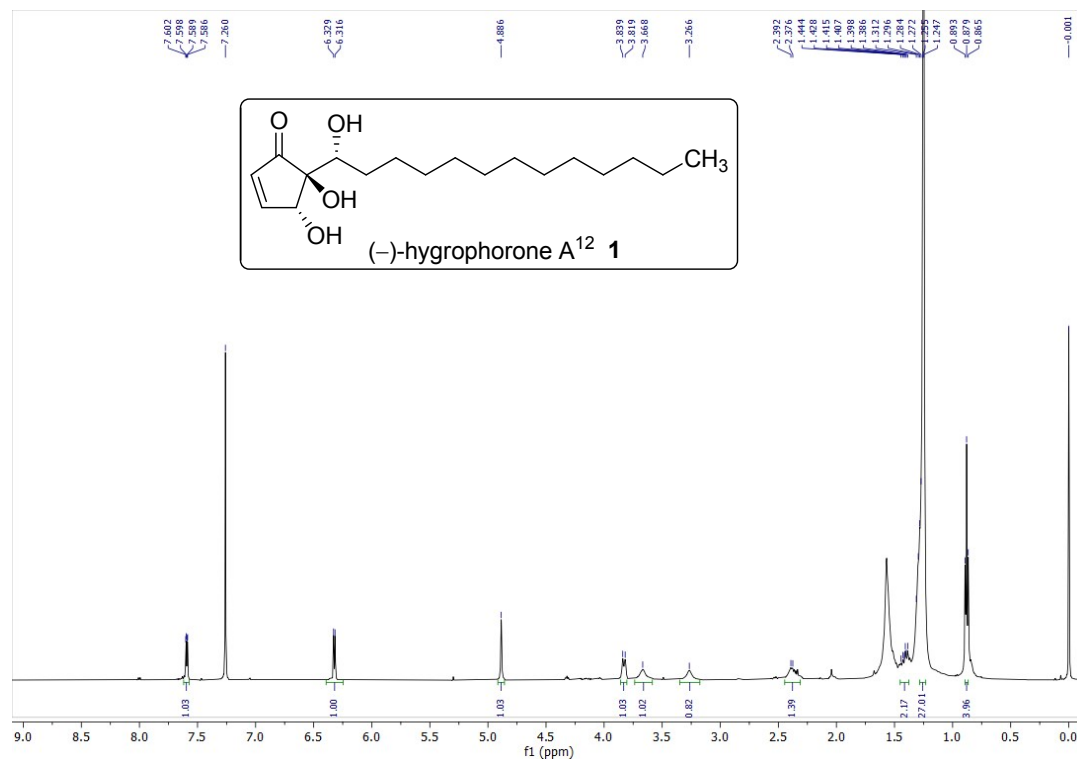

$^{13}\text{C}$  NMR of (-)-hygrophorone A<sup>12</sup> **1** (125 MHz) in  $\text{CDCl}_3$

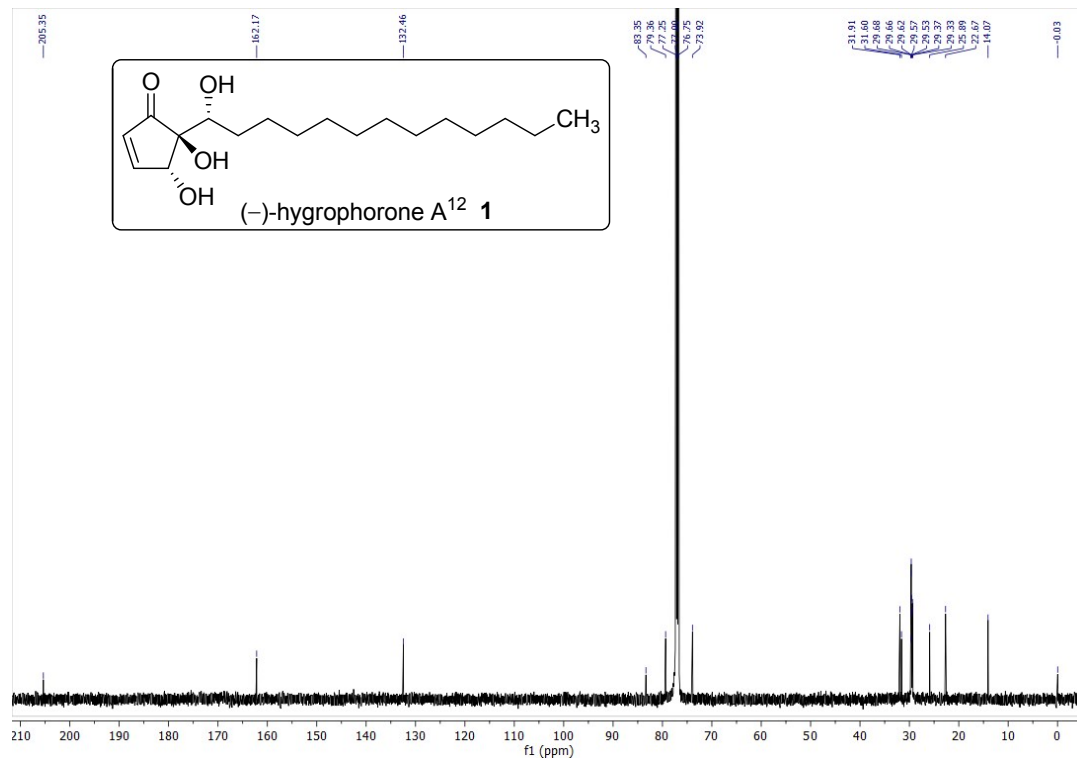

$^1\text{H}$  NMR of (+)-hygrophorone A<sup>12</sup> *ent*-1 (500 MHz) in  $\text{CDCl}_3$

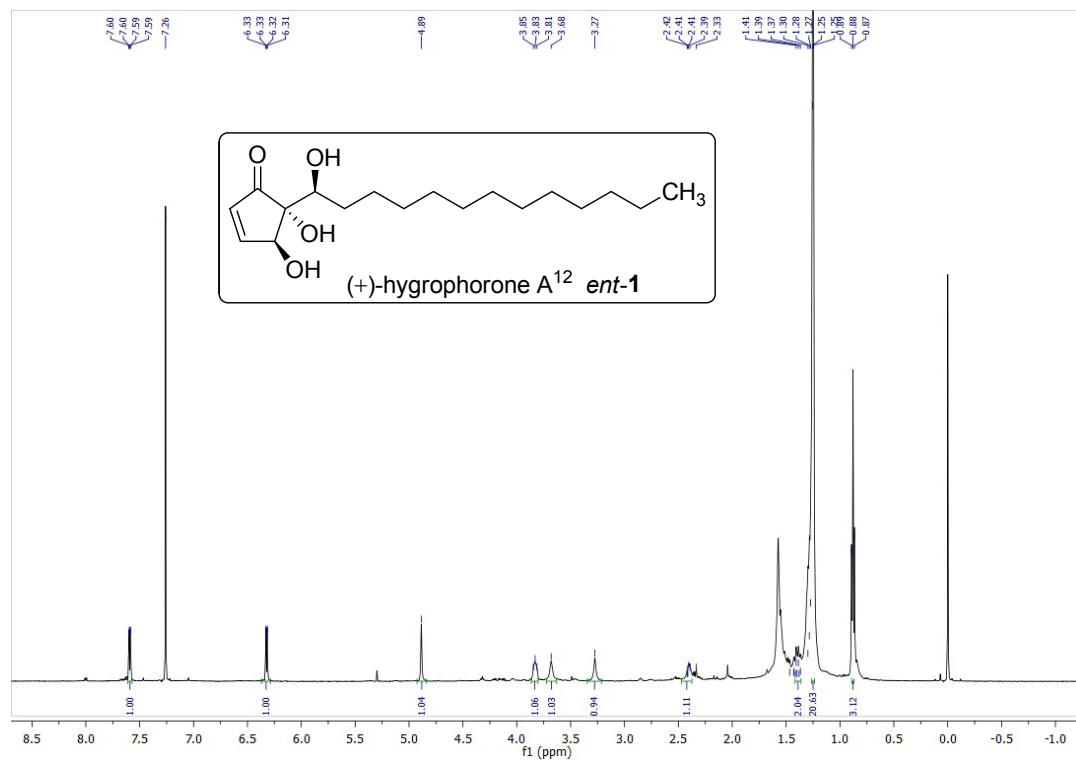

$^{13}\text{C}$  NMR of (+)-hygrophorone A<sup>12</sup> *ent*-1 (125 MHz) in  $\text{CDCl}_3$

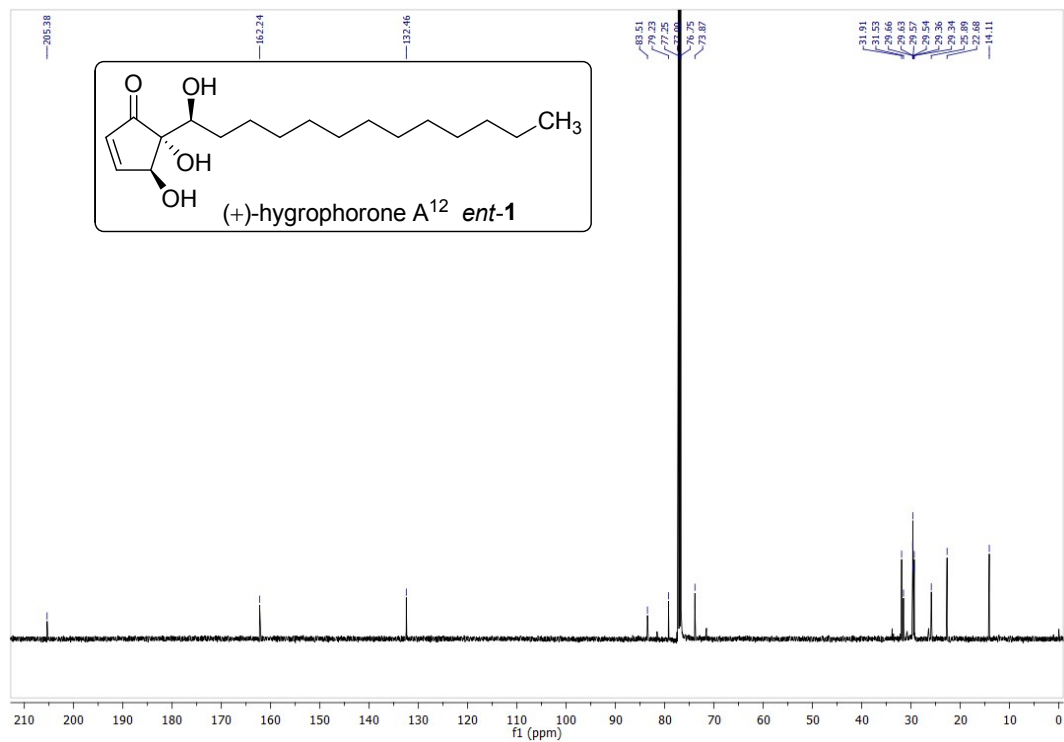

$^1\text{H}$  NMR of compound **17** (500 MHz) in  $\text{CDCl}_3$

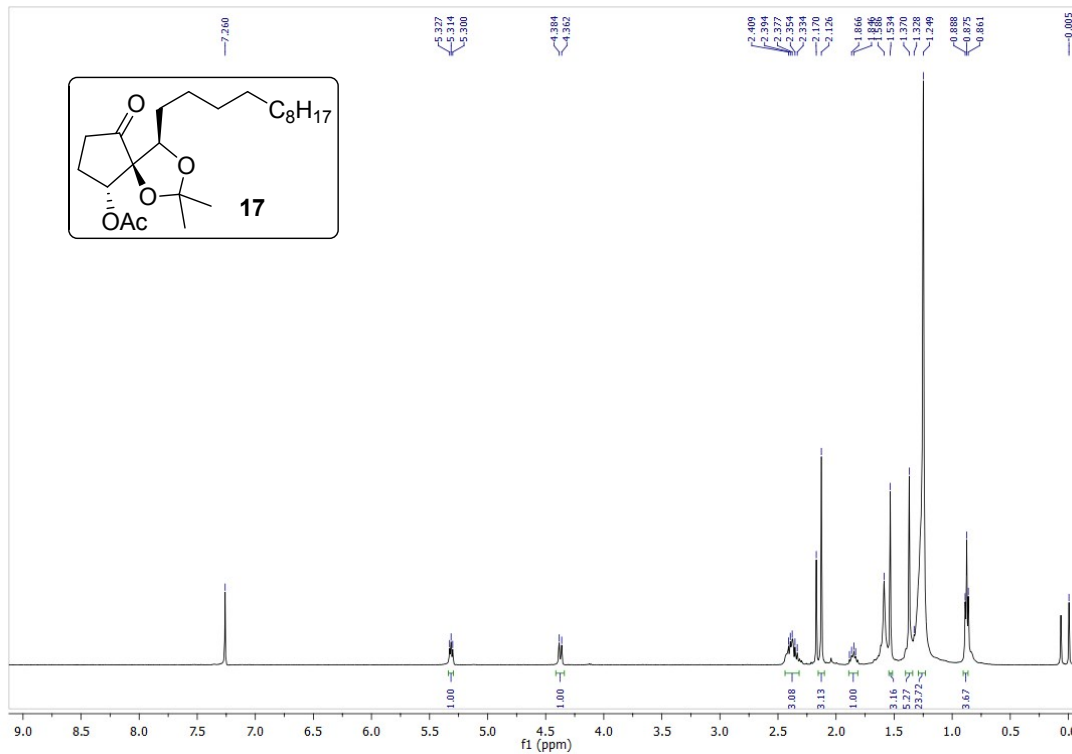

$^{13}\text{C}$  NMR of compound **17** (100 MHz) in  $\text{CDCl}_3$

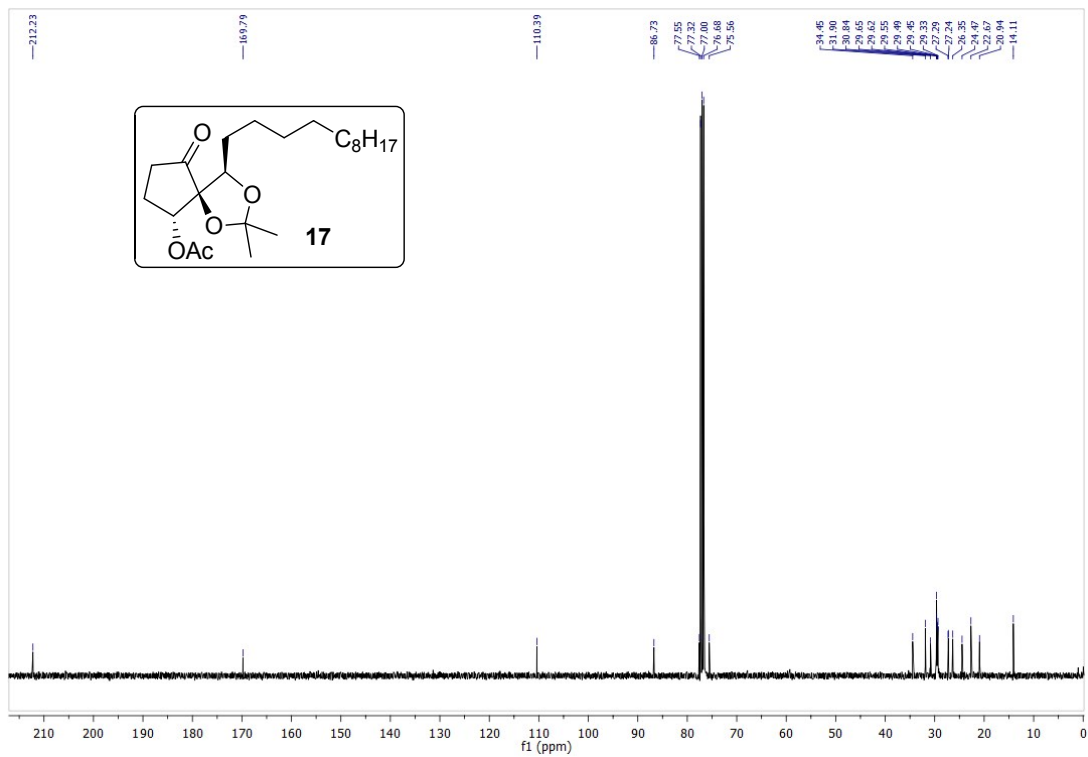

$^1\text{H}$  NMR of compound **18** (500 MHz) in  $\text{CDCl}_3$

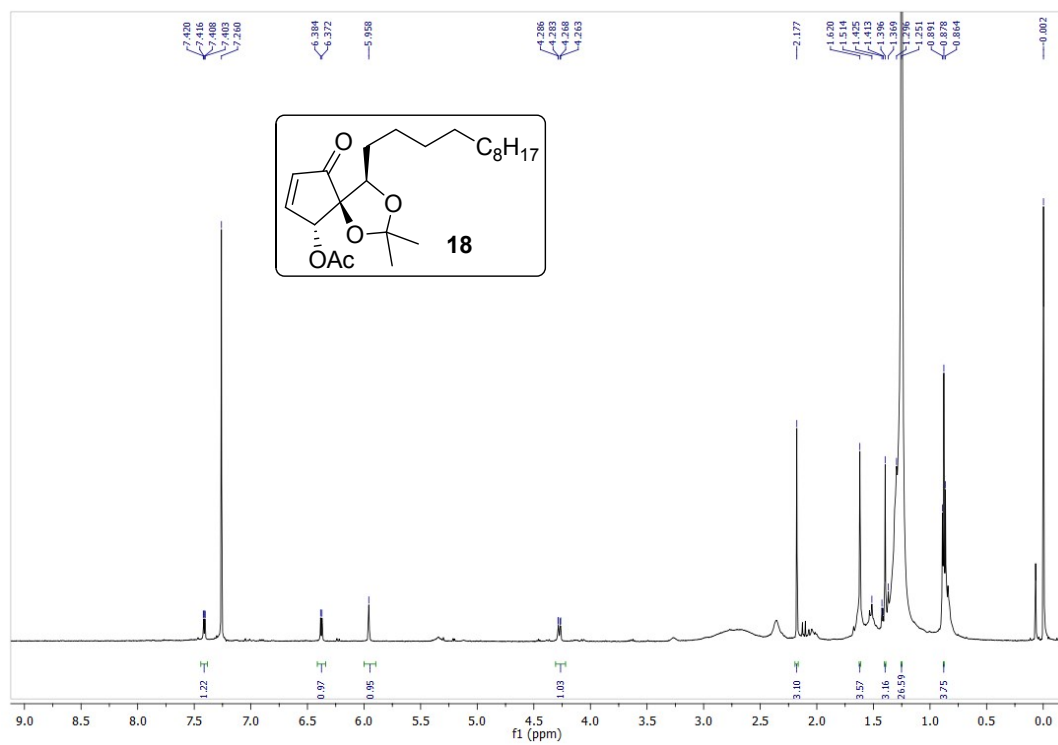

$^{13}\text{C}$  NMR of compound **18** (100 MHz) in  $\text{CDCl}_3$

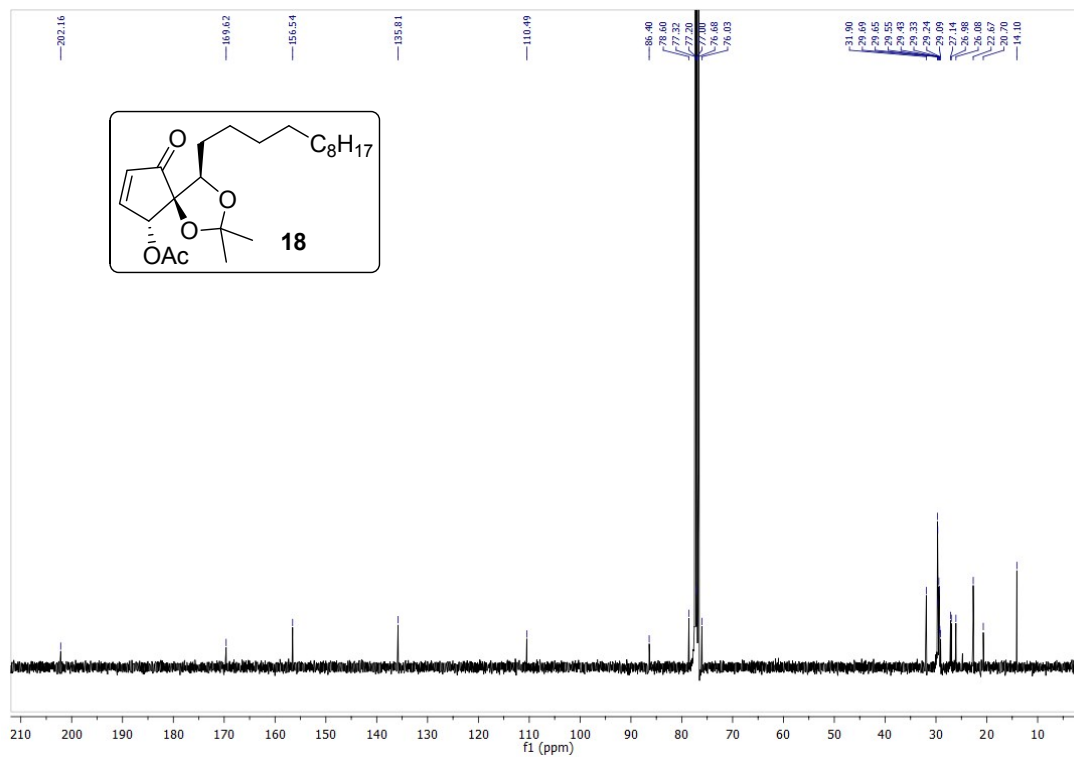

$^1\text{H}$  NMR of 4-*O*-acetyl-hygrophorone **A<sup>12</sup> 2** (400 MHz) in  $\text{CDCl}_3$

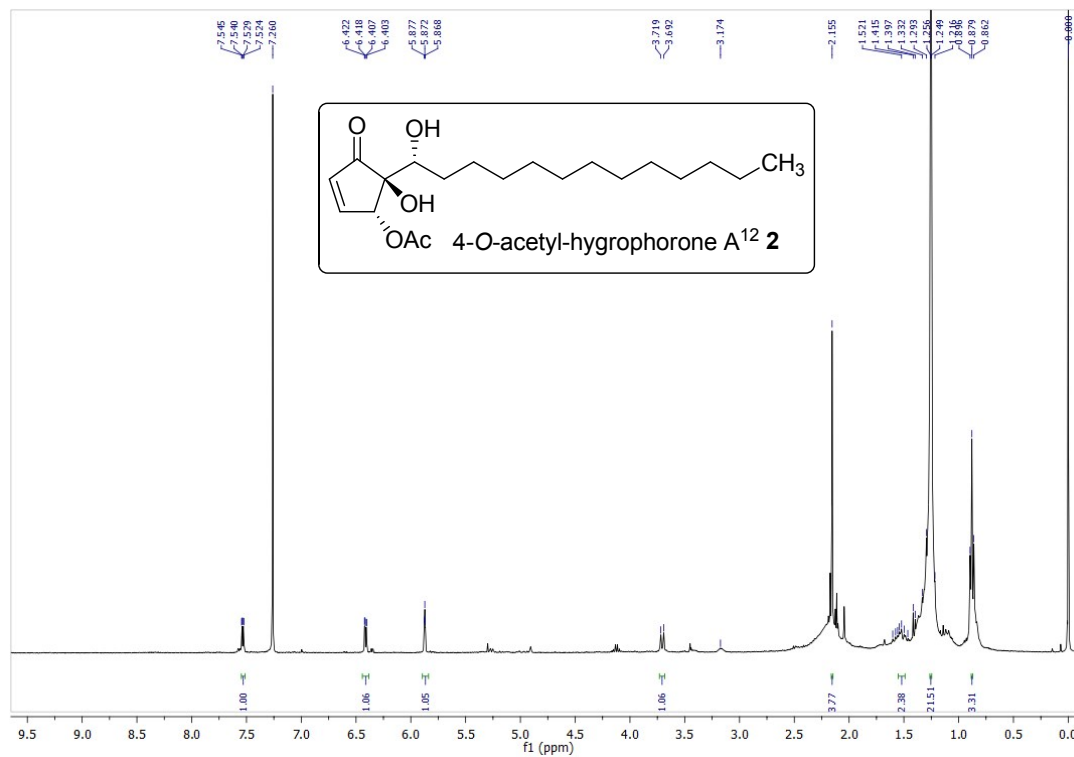

$^{13}\text{C}$  NMR of 4-*O*-acetyl-hygrophorone **A<sup>12</sup> 2** (100 MHz) in  $\text{CDCl}_3$

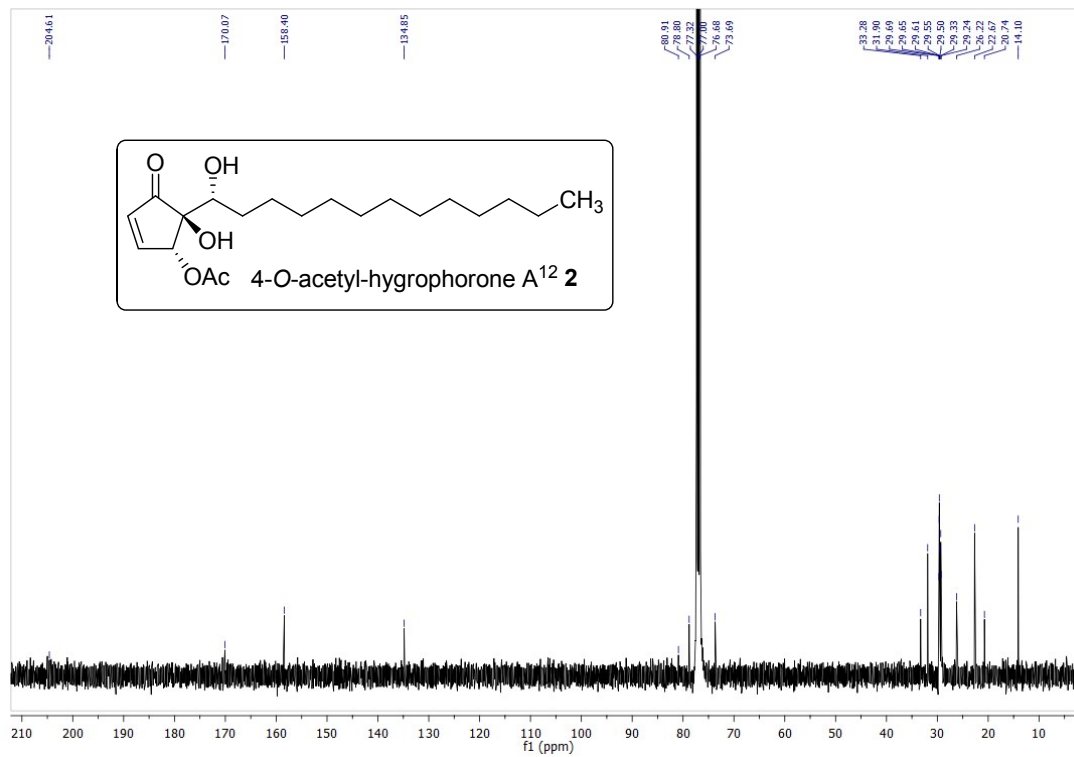



$^1\text{H}$  NMR of compound **19** (500 MHz) in  $\text{CDCl}_3$

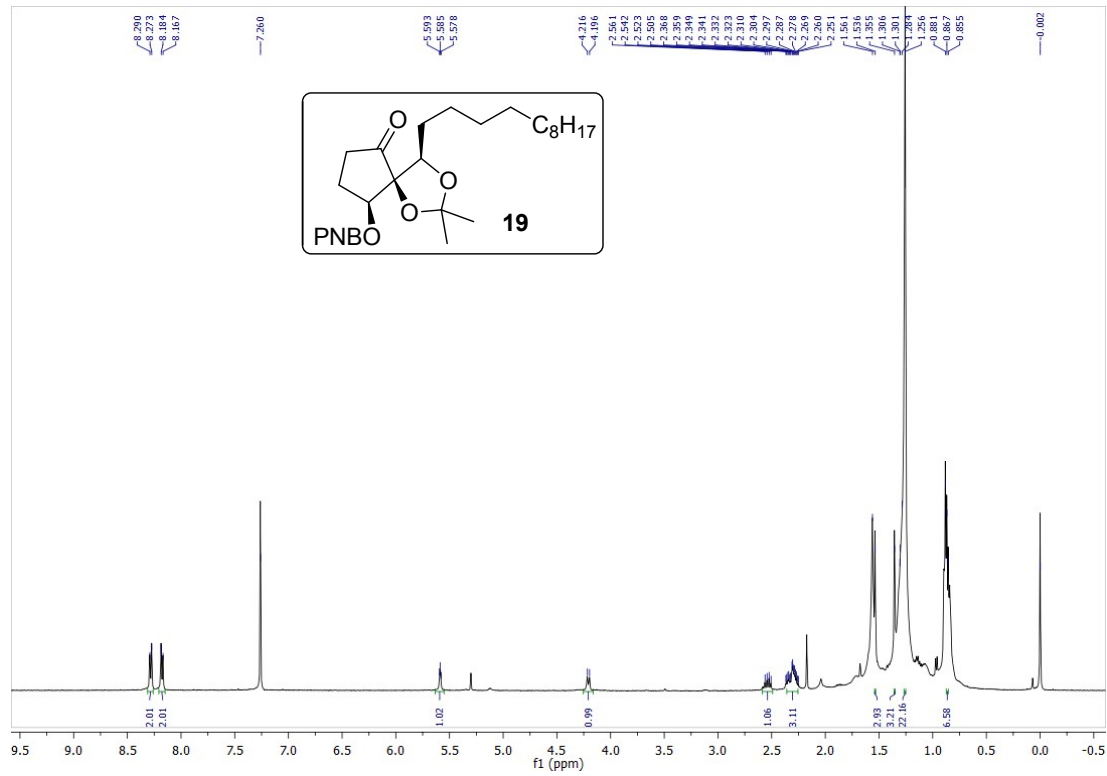

$^{13}\text{C}$  NMR of compound **19** (125 MHz) in  $\text{CDCl}_3$

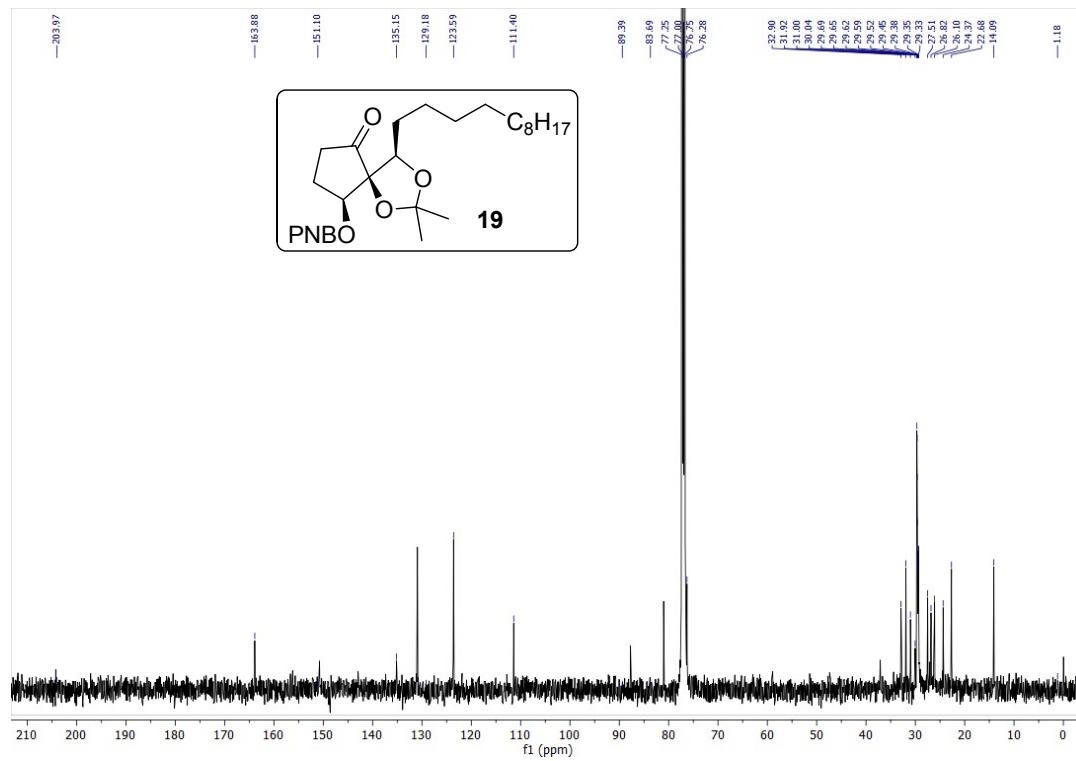

$^1\text{H}$  NMR of compound **20** (500 MHz) in  $\text{CDCl}_3$

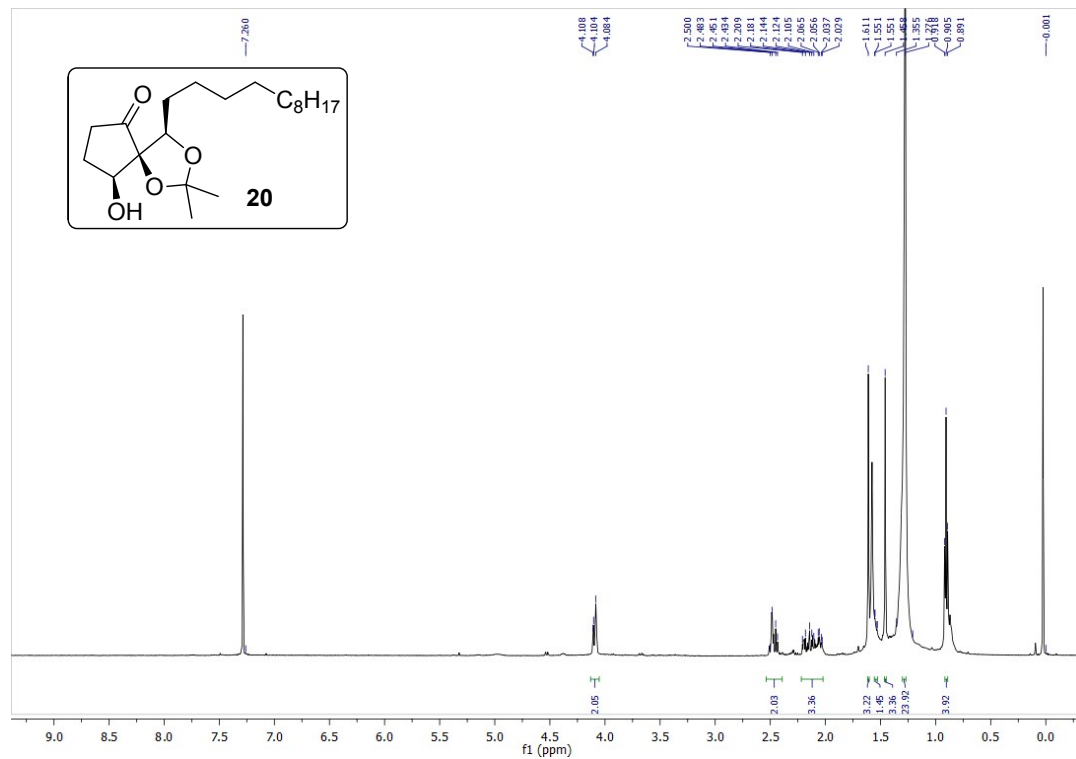

$^{13}\text{C}$  NMR of compound **20** (125 MHz) in  $\text{CDCl}_3$

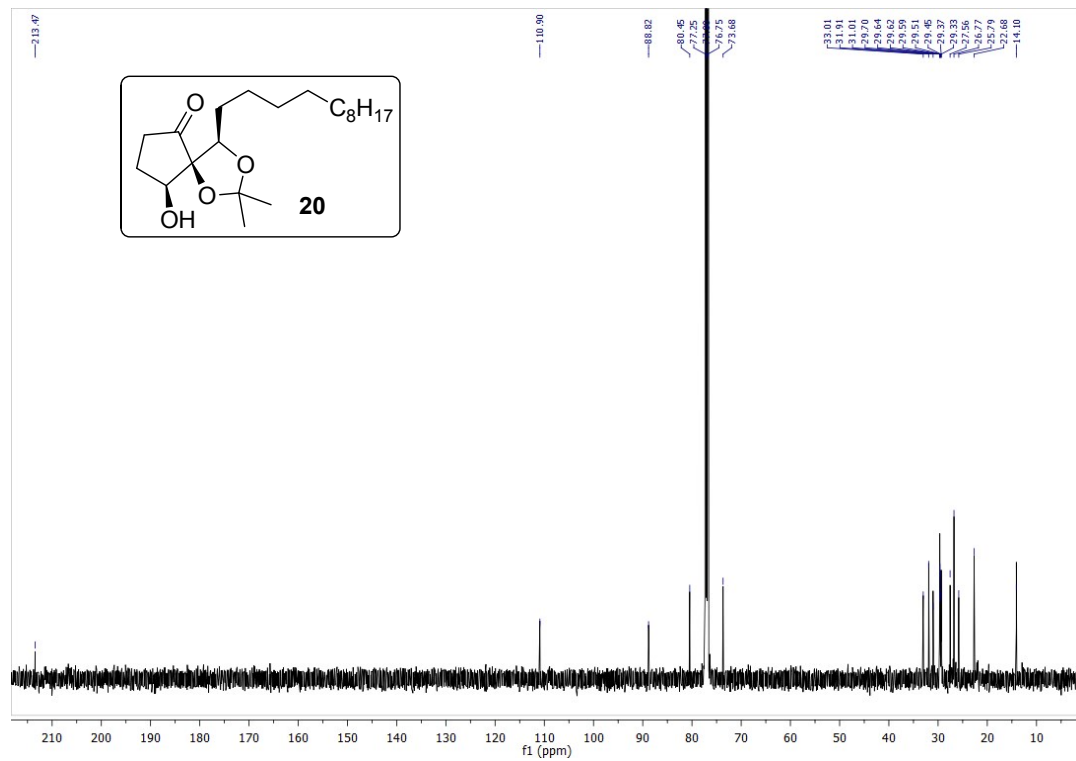



$^1\text{H}$  NMR of (+)-hygrophorone B<sup>12</sup> **3** (400 MHz) in  $\text{CDCl}_3$

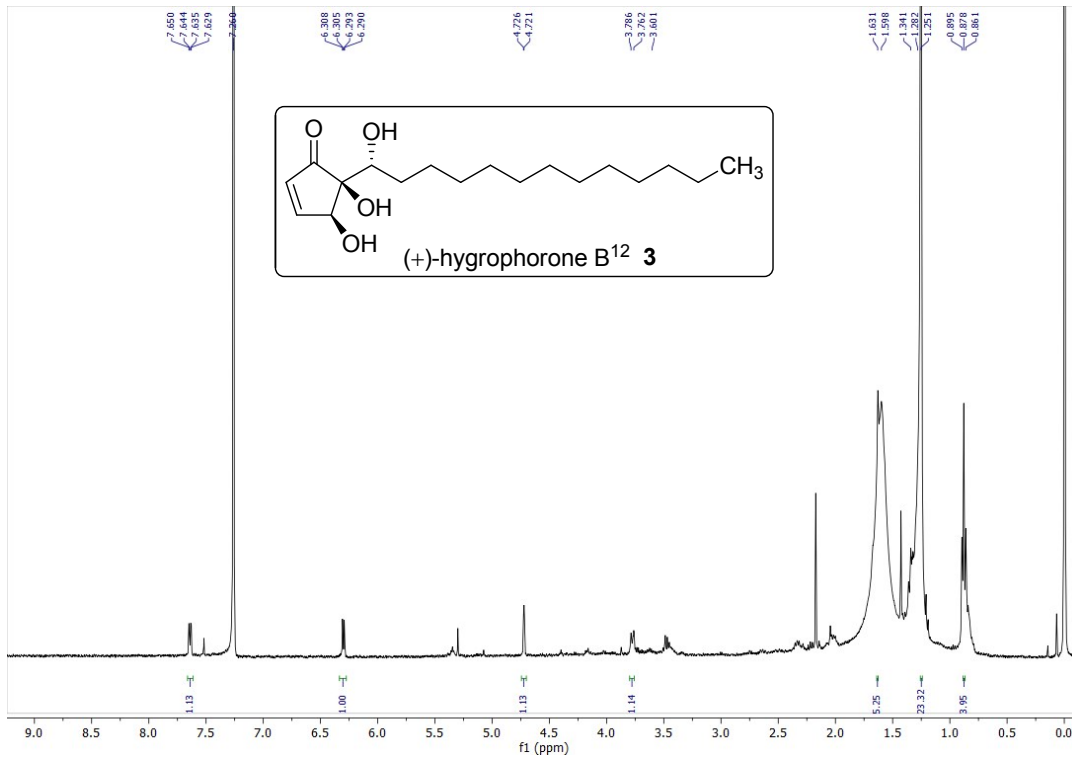

$^{13}\text{C}$  NMR of (+)-hygrophorone B<sup>12</sup> **3** (125 MHz) in  $\text{CDCl}_3$

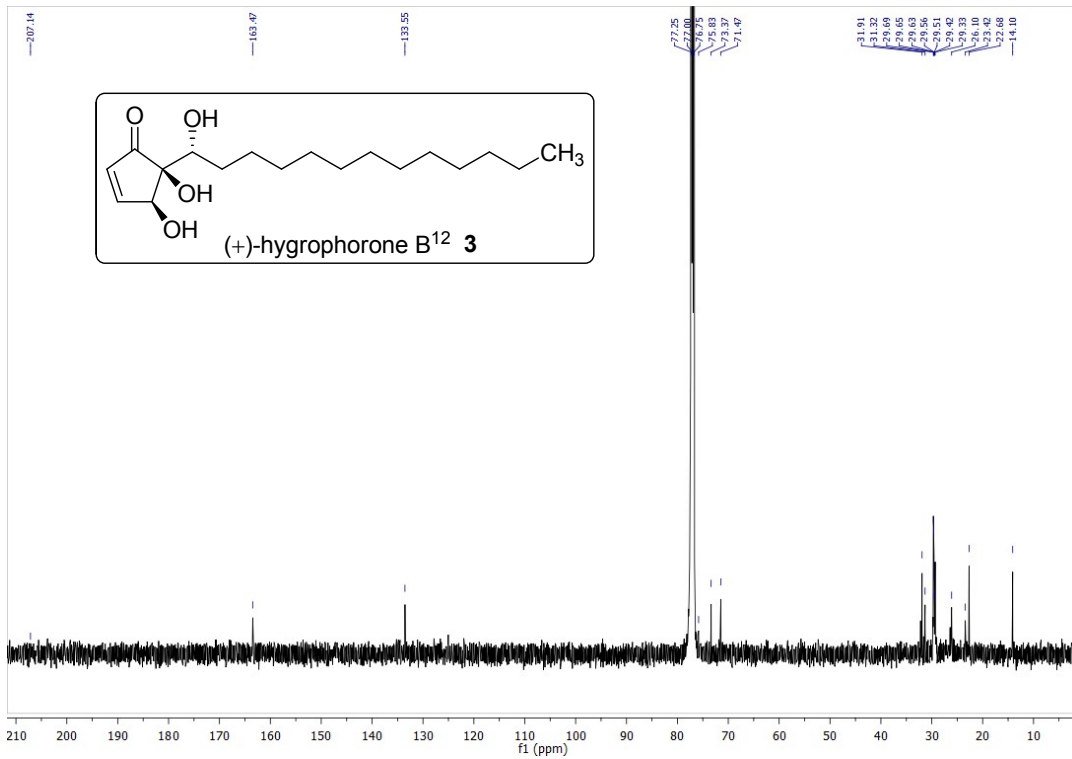

**Single crystal X-ray diffraction data for (+)-hygrophorone A<sup>12</sup> *ent*-1** was collected using a Bruker SMART APEX diffractometer equipped with a 3-axis goniometer (Table S1).<sup>1</sup> The crystals were covered with Paratone-N and mounted on a glass capillary. The data was collected at 273 K using Mo K $\alpha$  radiation ( $\lambda = 0.71073 \text{ \AA}$ ). The integration of data was performed using the SAINT. Empirical absorption correction was applied using SADABS.<sup>2</sup> Structural solution was accomplished by direct method and refined by full-matrix least-square on F<sup>2</sup> using either SHELXTL<sup>3</sup> or SHELXL-2013 incorporated in OLEX2. All the non-hydrogen atoms were refined anisotropically. The positions of hydrogen atoms were fixed according to a riding model and were refined isotropically. Important crystallographic data are provided in Table S1.<sup>4</sup>

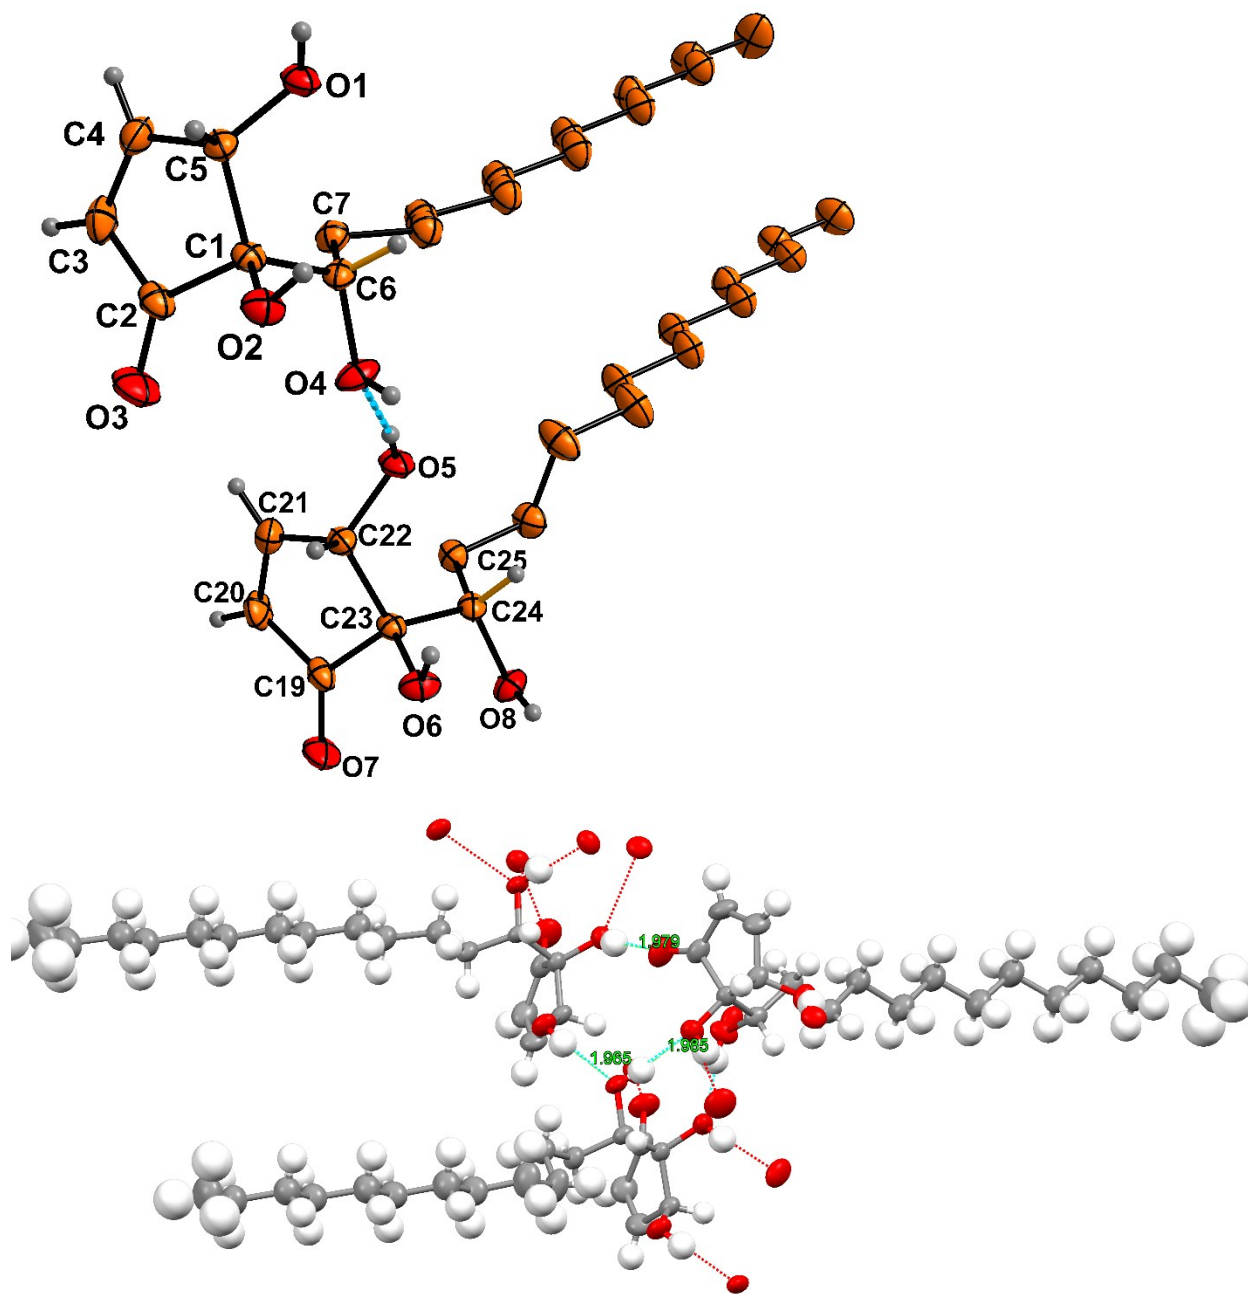

**Figure 1.** Molecular structure of (+)-hygrophorone A<sup>12</sup> *ent*-1 from X-ray crystallography. All hydrogen atoms of alkyl chains are omitted for clarity and thermal ellipsoids are shown at the 30% probability level. Data collection temperature: 273 K.

**Table S1. Crystal data and structure refinement for (+)-hygrophorone *ent*-1**

|                                                     |                                                                 |
|-----------------------------------------------------|-----------------------------------------------------------------|
| Empirical formula                                   | C <sub>18</sub> H <sub>32</sub> O <sub>4</sub>                  |
| Formula weight                                      | 312.44                                                          |
| Temperature, K                                      | 273.15                                                          |
| Wavelength, Å                                       | 0.71073                                                         |
| Crystal system                                      | monoclinic                                                      |
| Space group                                         | P2 <sub>1</sub>                                                 |
| <i>a</i> , Å                                        | 7.9985(6)                                                       |
| <i>b</i> , Å                                        | 10.3197(6)                                                      |
| <i>c</i> , Å                                        | 22.4140(14)                                                     |
| $\alpha$ , deg                                      | 90                                                              |
| $\beta$ , deg                                       | 93.464(2)                                                       |
| $\gamma$ , deg                                      | 90                                                              |
| Volume, Å <sup>3</sup>                              | 1846.7(2)                                                       |
| <i>Z</i>                                            | 4                                                               |
| Density (calcd), mg/m <sup>3</sup>                  | 1.124                                                           |
| Absorption coefficient, mm <sup>-1</sup>            | 0.077                                                           |
| <i>F</i> (000)                                      | 688.0                                                           |
| Crystal size, mm <sup>3</sup>                       | 0.17 × 0.12 × 0.11                                              |
| $\theta$ range for data collection, deg             | 4.346 to 56.612                                                 |
| Limiting indices                                    | -10 ≤ <i>h</i> ≤ 10, -13 ≤ <i>k</i> ≤ 13, -29 ≤ <i>l</i> ≤ 29   |
| No. of reflection collected                         | 48074                                                           |
| No. of independent reflection                       | 9176                                                            |
| Refinement method                                   | Full-matrix least-squares on <i>F</i> <sup>2</sup>              |
| No. of data/restraints/ parameters                  | 9176/1/405                                                      |
| Goodness-of-fit on <i>F</i> <sup>2</sup>            | 1.025                                                           |
| Final <i>R</i> indices [ <i>I</i> > 2σ( <i>I</i> )] | <i>R</i> <sub>1</sub> = 0.0501, <i>wR</i> <sub>2</sub> = 0.1023 |
| <i>R</i> indices (all data)                         | <i>R</i> <sub>1</sub> = 0.0862, <i>wR</i> <sub>2</sub> = 0.1169 |
| Largest diff peak and hole, e Å <sup>-3</sup>       | 0.14/-0.16                                                      |

**References:**

1. SMART, Bruker Molecular Analysis Research Tool, Version 5.618, Bruker AXS, Madison, WI (2000).
2. SAINT-NT, Version 6.04; Bruker AXS, WI (2001).
3. SHELXTL-NT, Version 6.10, Bruker AXS, Madison, WI (2000).
4. **CCDC 2035478** contain the supplementary crystallographic data for this paper. These data can be obtained free of charge from The Cambridge Crystallographic Data Centre.
